# Supplementary material for: Quality and Biodegradation Process of Dissolved Organic Carbon in Typical Fresh-Leaf Leachate in the Wuhan Urban Forest Park
Source: MDPI journal article supplement (doi:10.3390/w16040558), 2024-02-12
Supplement: s1 [file s1]

# SUPPORTING MATERIAL

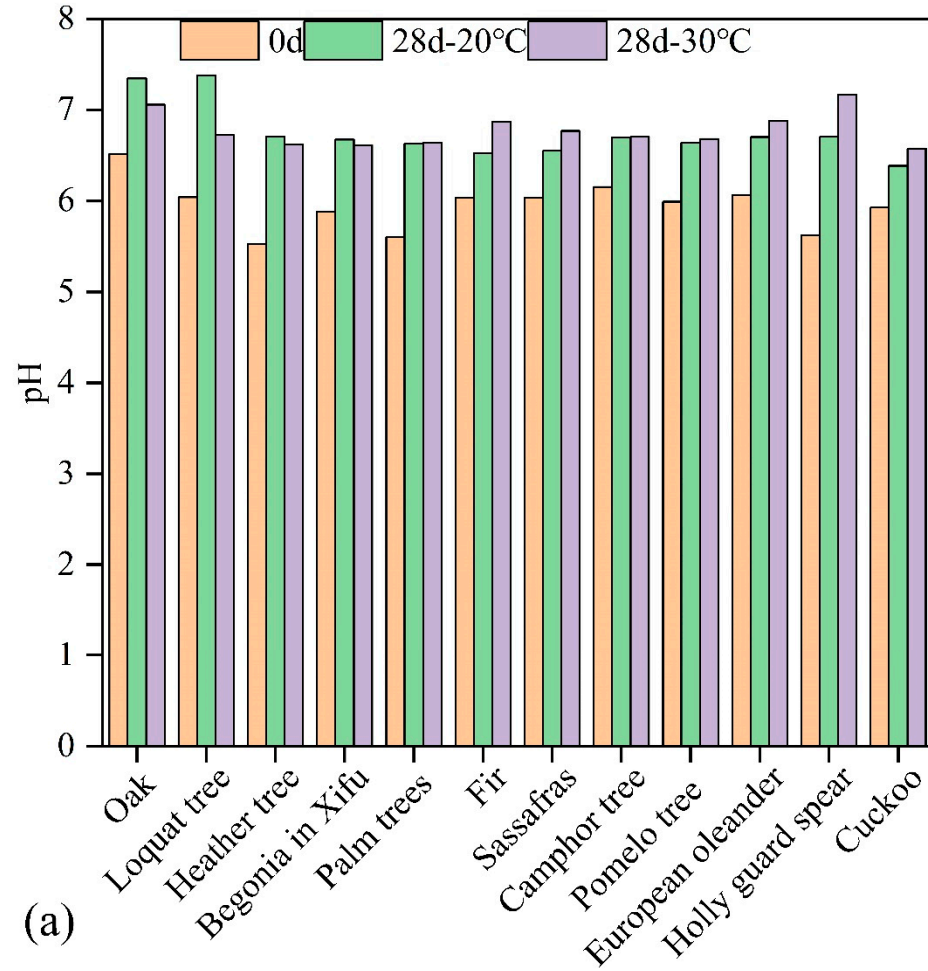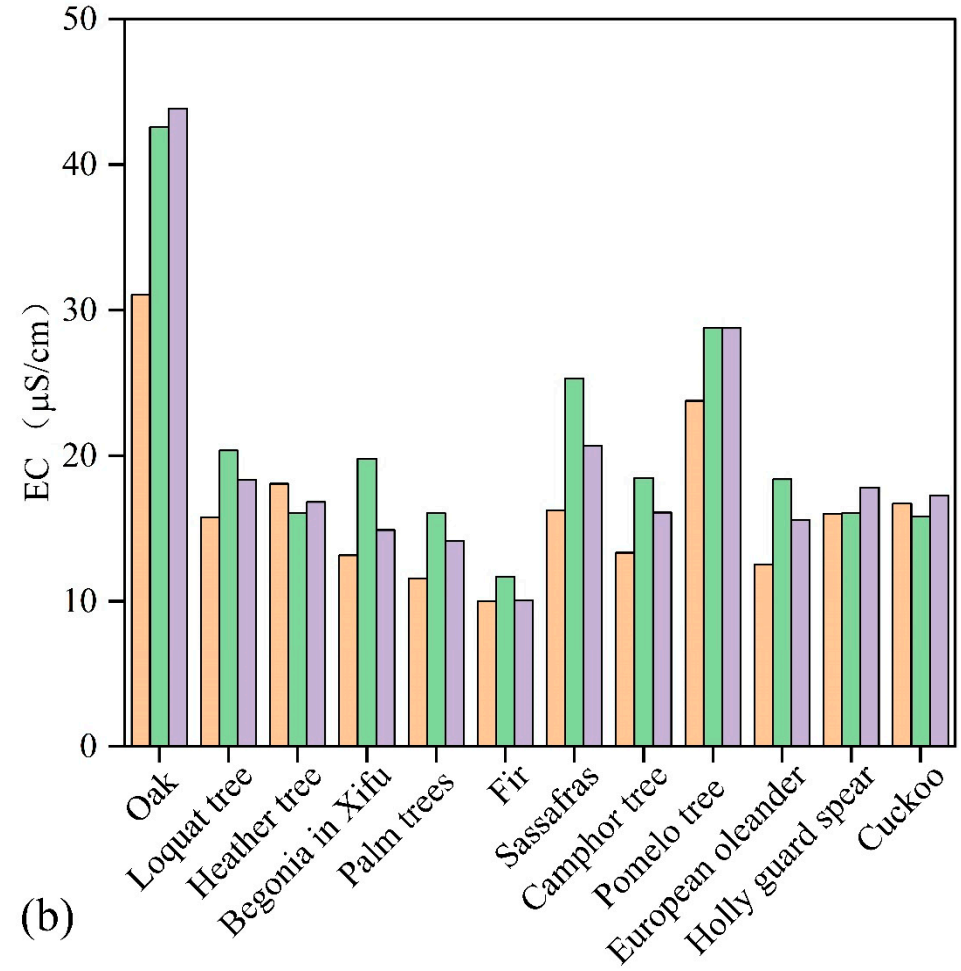

**Figure. S1** pH(a) and EC(b) changes on 0d and 28d incubation.

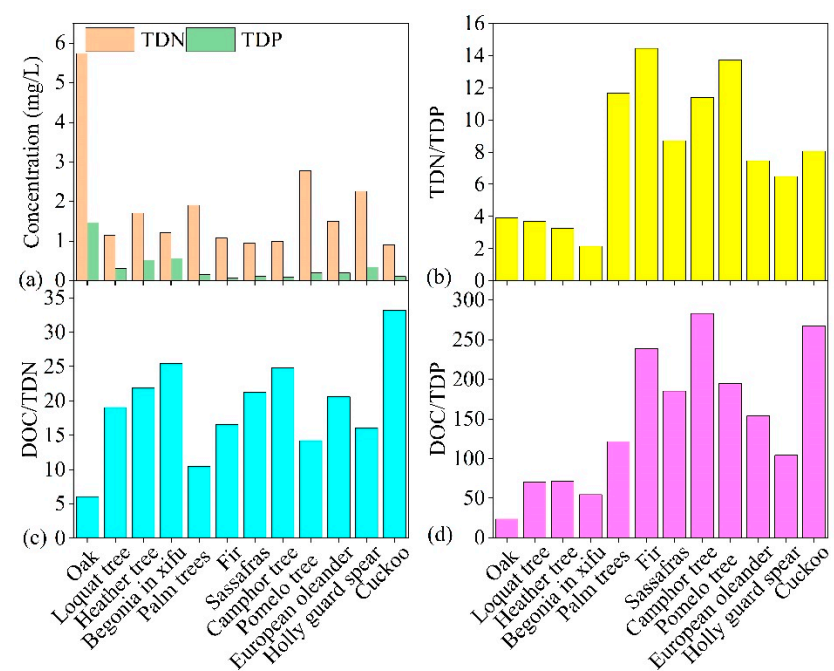

**Figure. S2** TDN and TDP concentrations (a), TDN/TDP (b), DOC/TDN (c) and DOC/TDP (d) in fresh-leaf leachate.

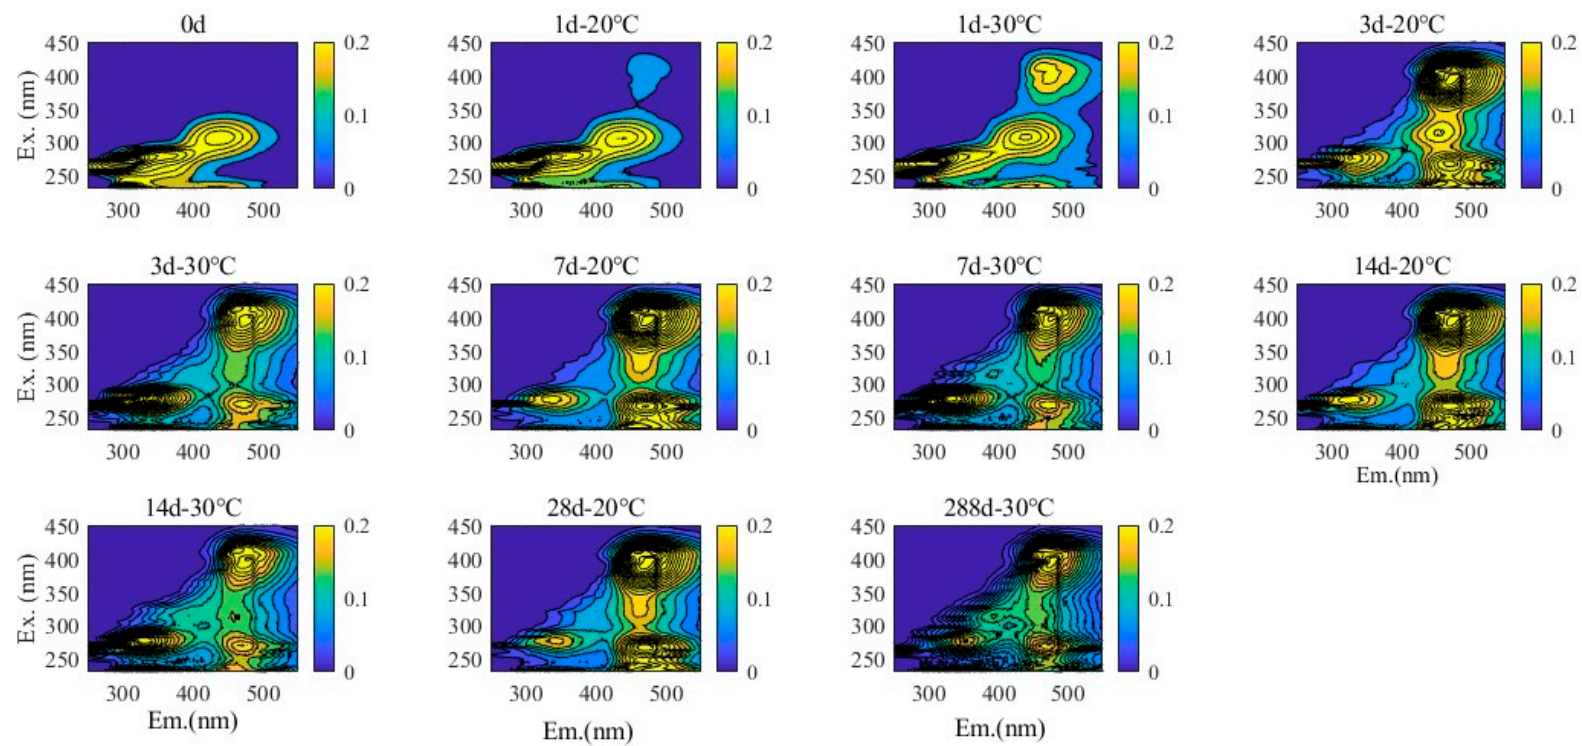

**Figure. S3** Quercus oak tree leachate DOM degradation process.

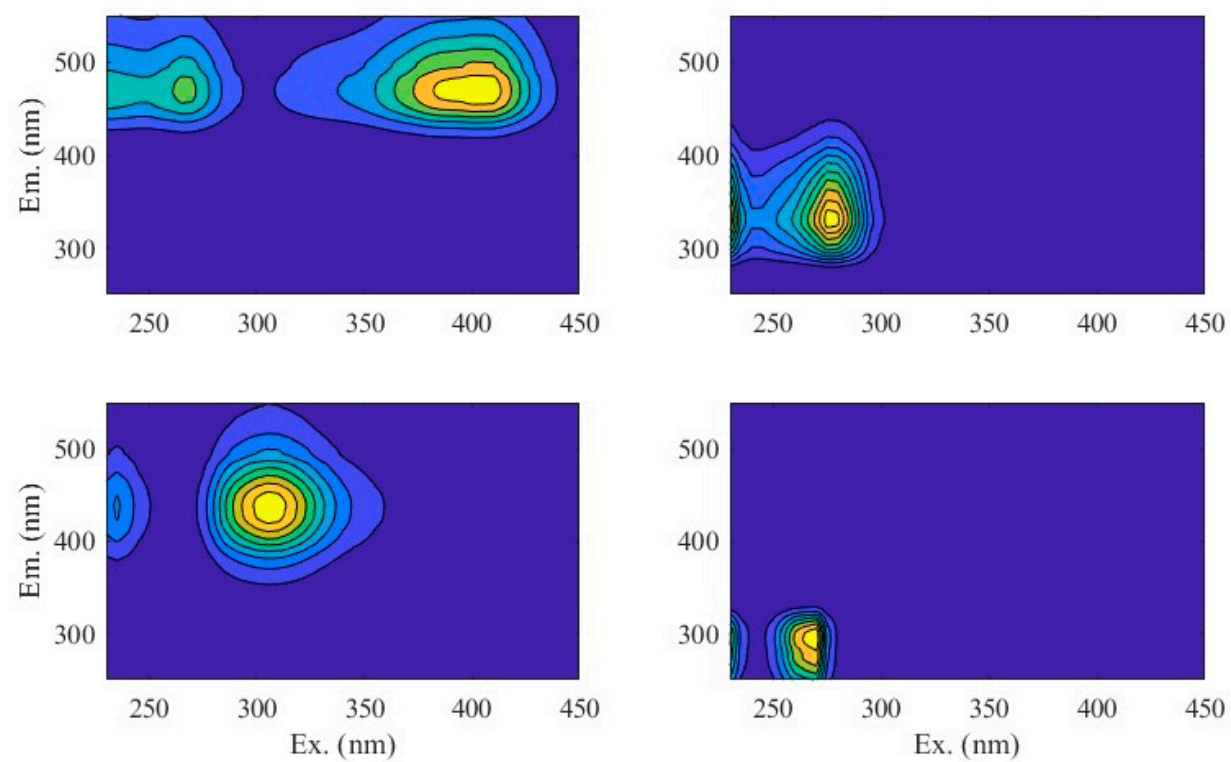

**Figure. S4** Four components of fluorescent substances in Quercus oak tree leachate.



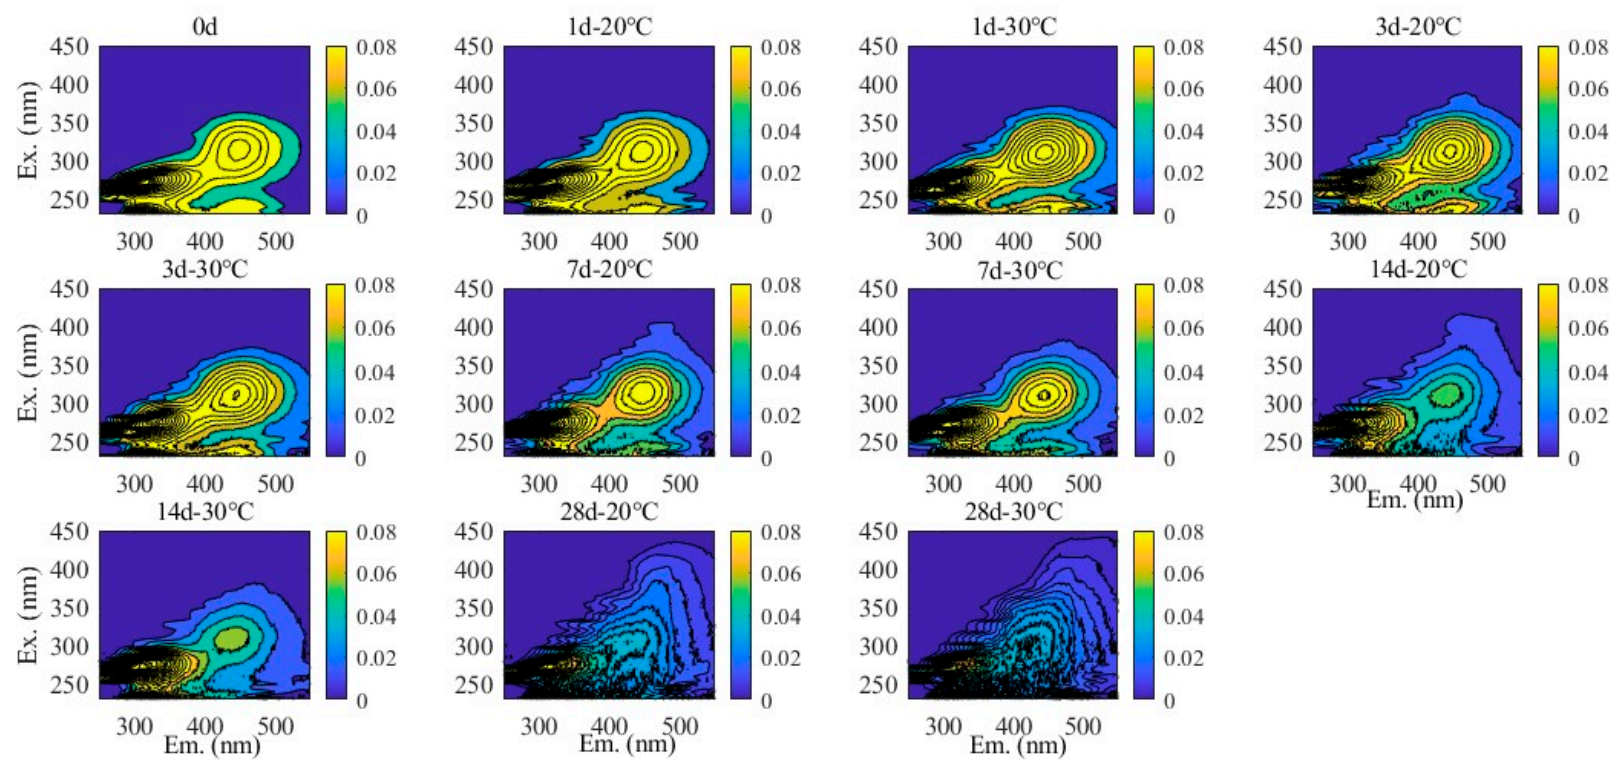

**Figure. S5** Loquat tree leachate DOM degradation process.

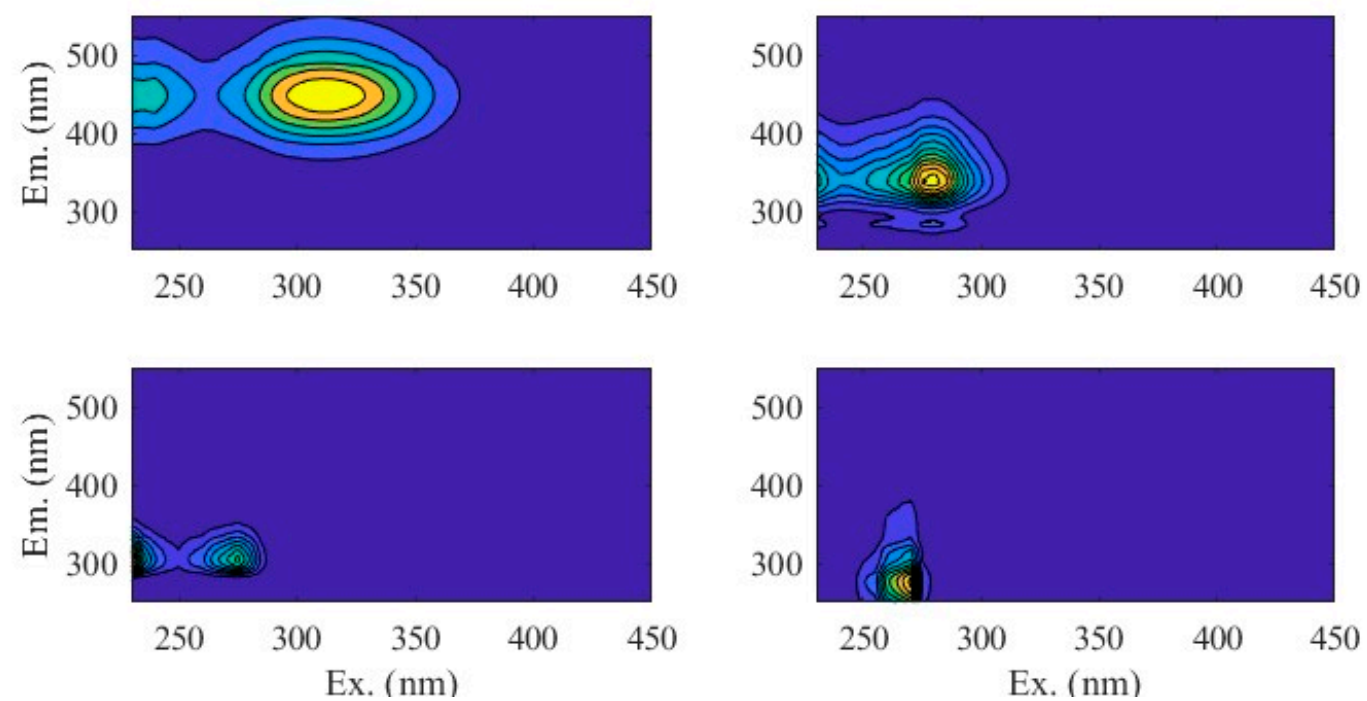

**Figure. S6** Four components of fluorescent substances in loquat tree leachate.

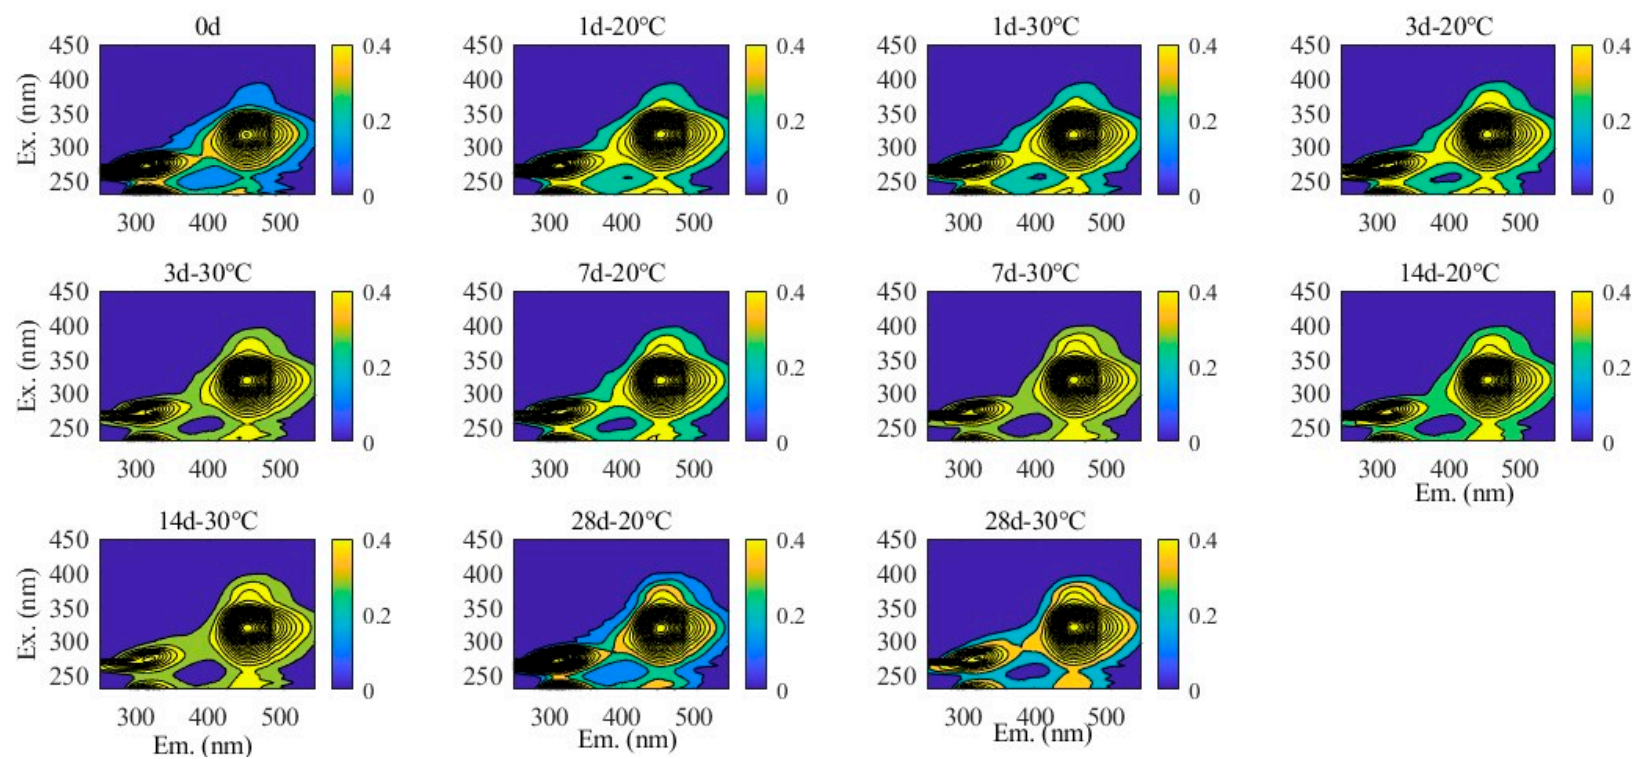

**Figure. S7** DOM degradation process of Heather tree leachate.

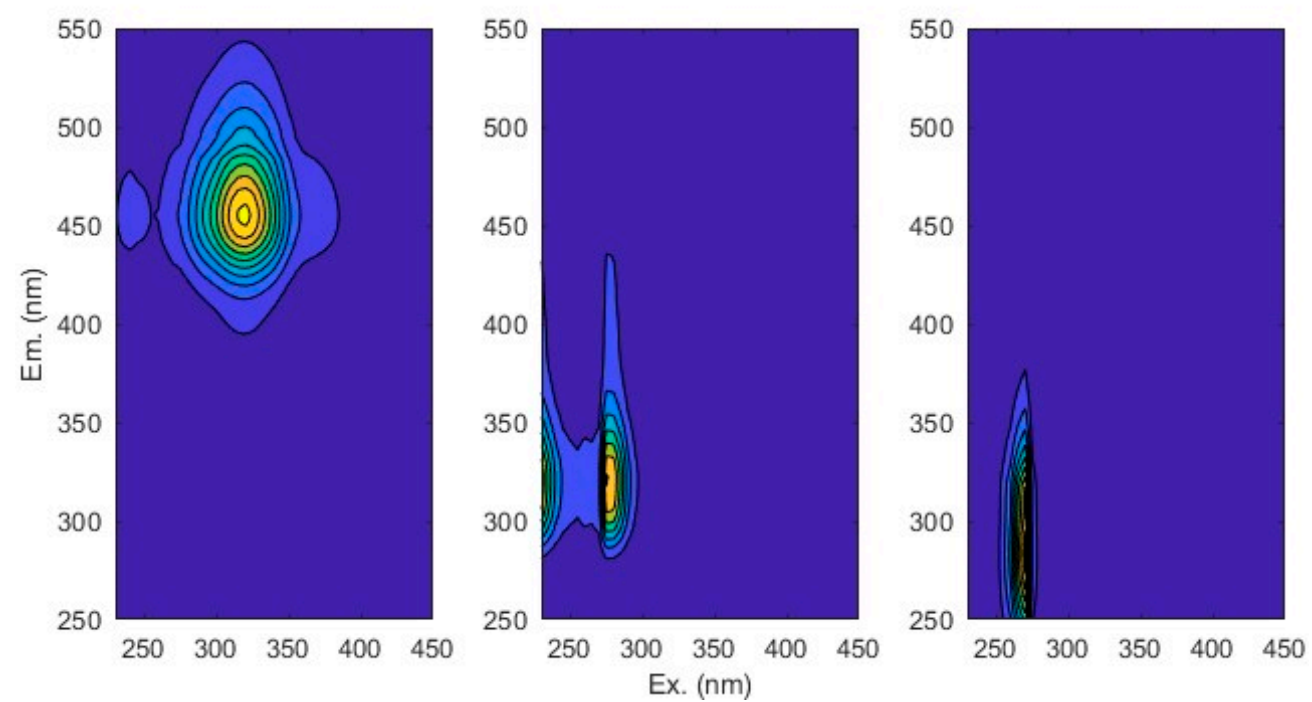

**Figure. S8** Three components of fluorescent substances in Heather tree leachate.

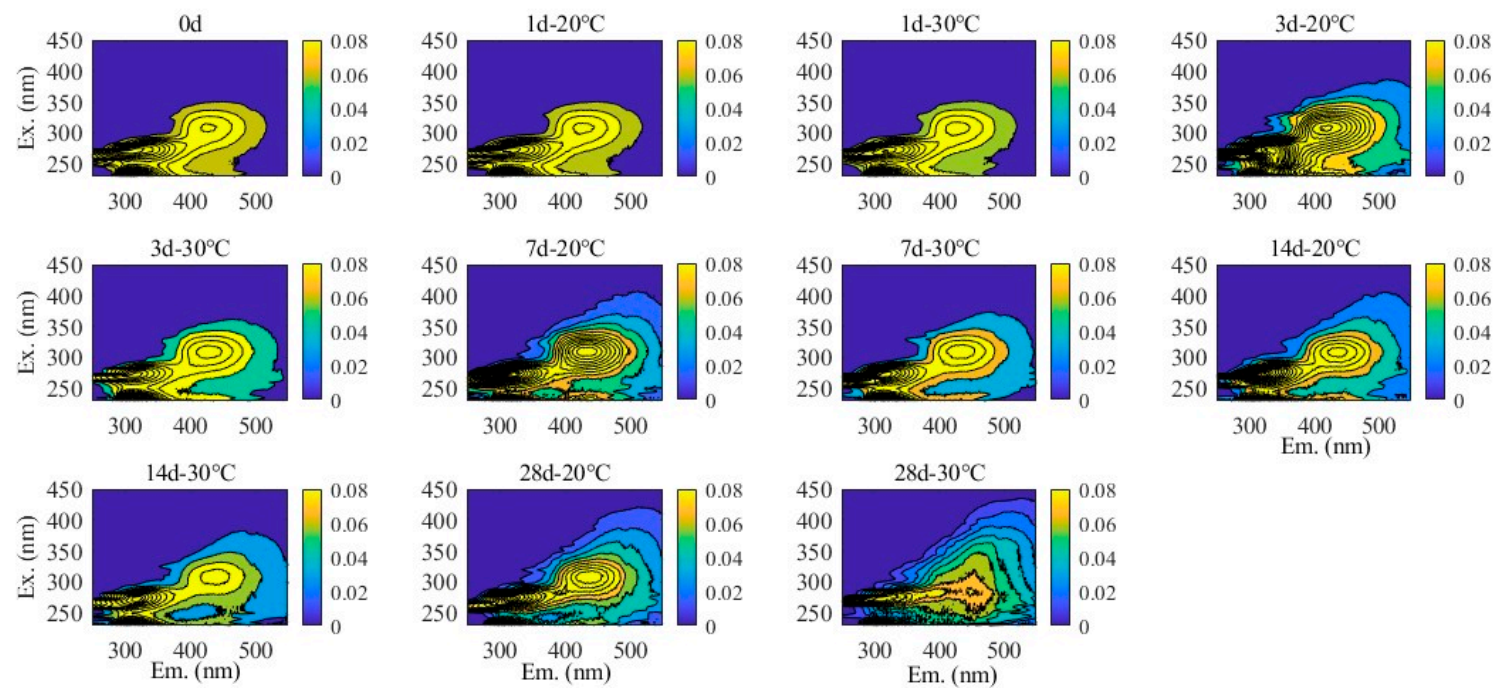

**Figure. S9** DOM degradation process of Begonia in Xifu tree leachate.

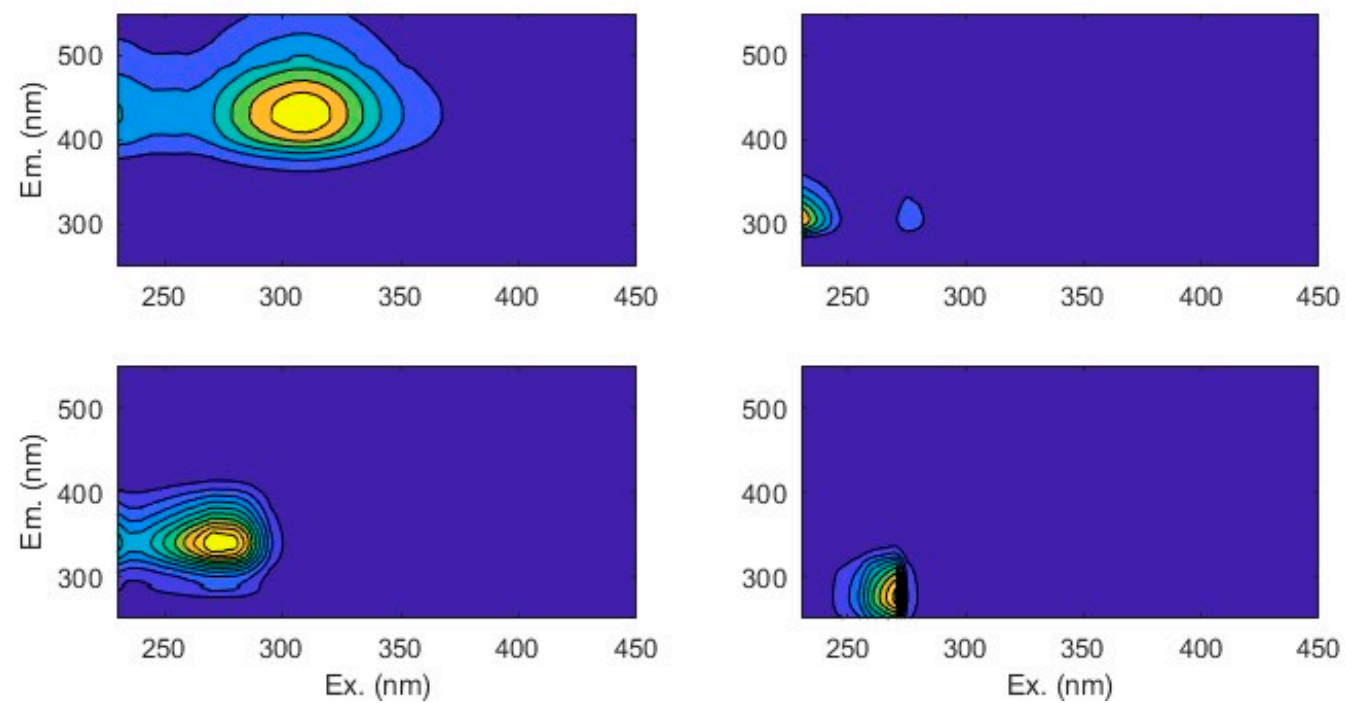

**Figure. S10** Four components of fluorescent substances in Begonia in Xifu tree leachate.



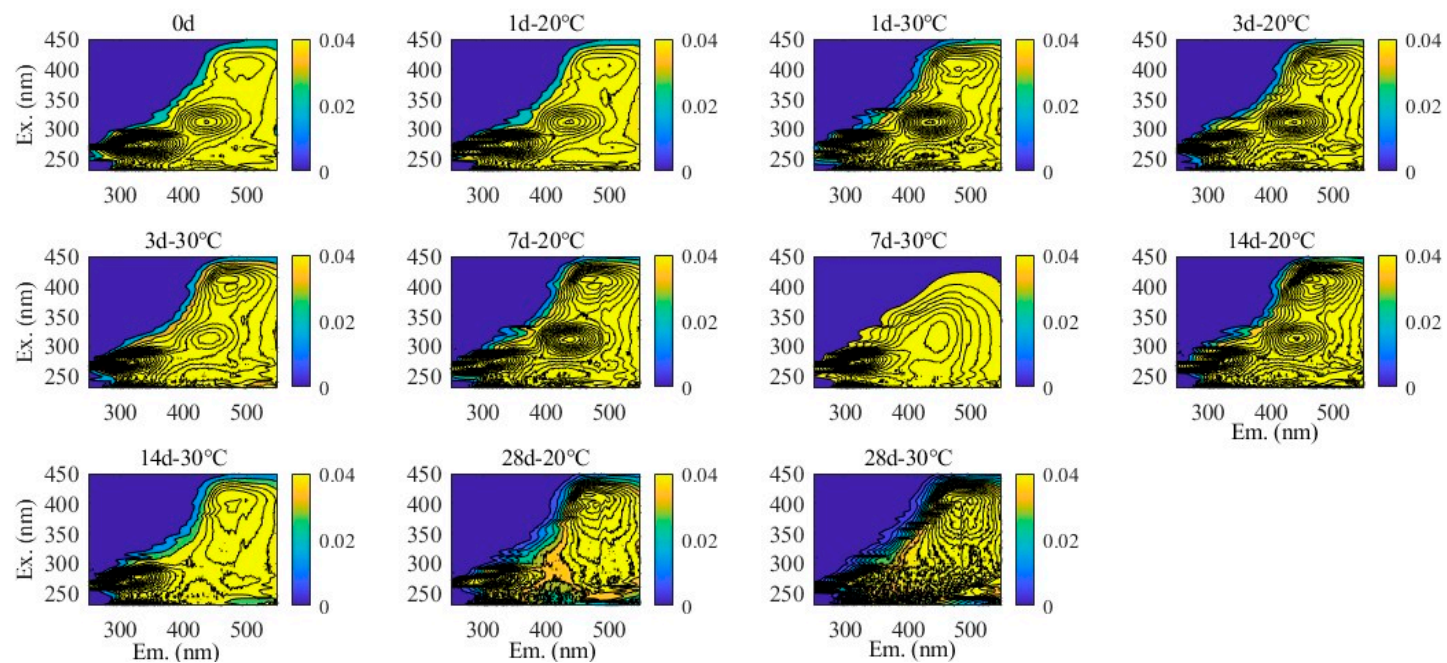

**Figure. S11** DOM degradation process of palm tree leachate.

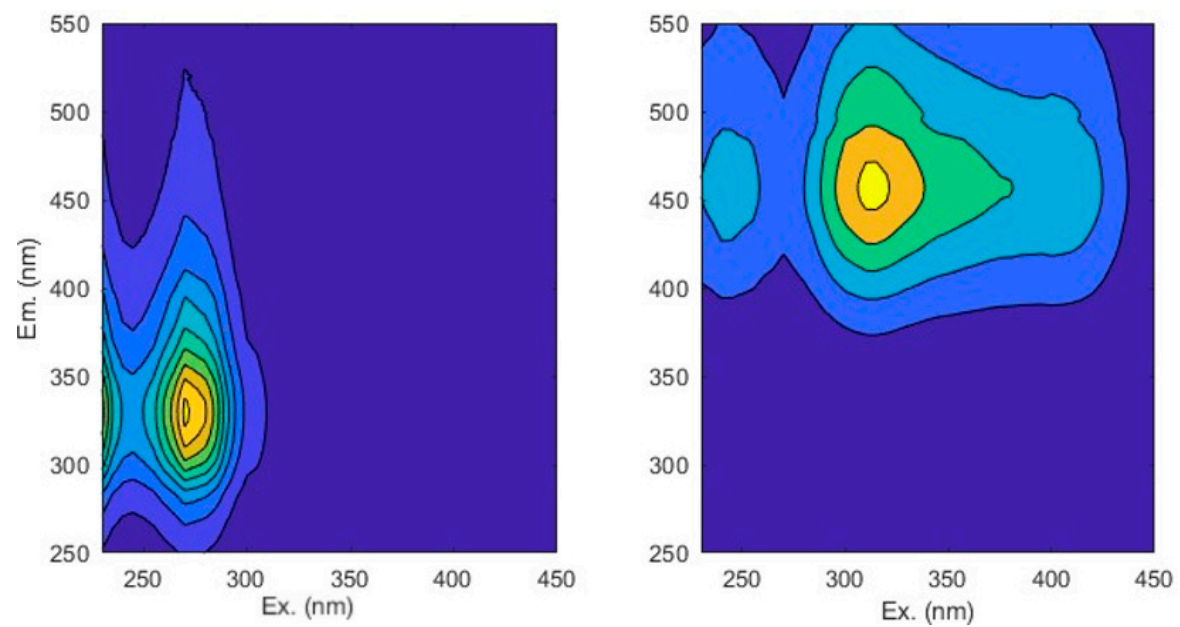

**Figure. S12** Two components of fluorescent substances in palm tree leachate.



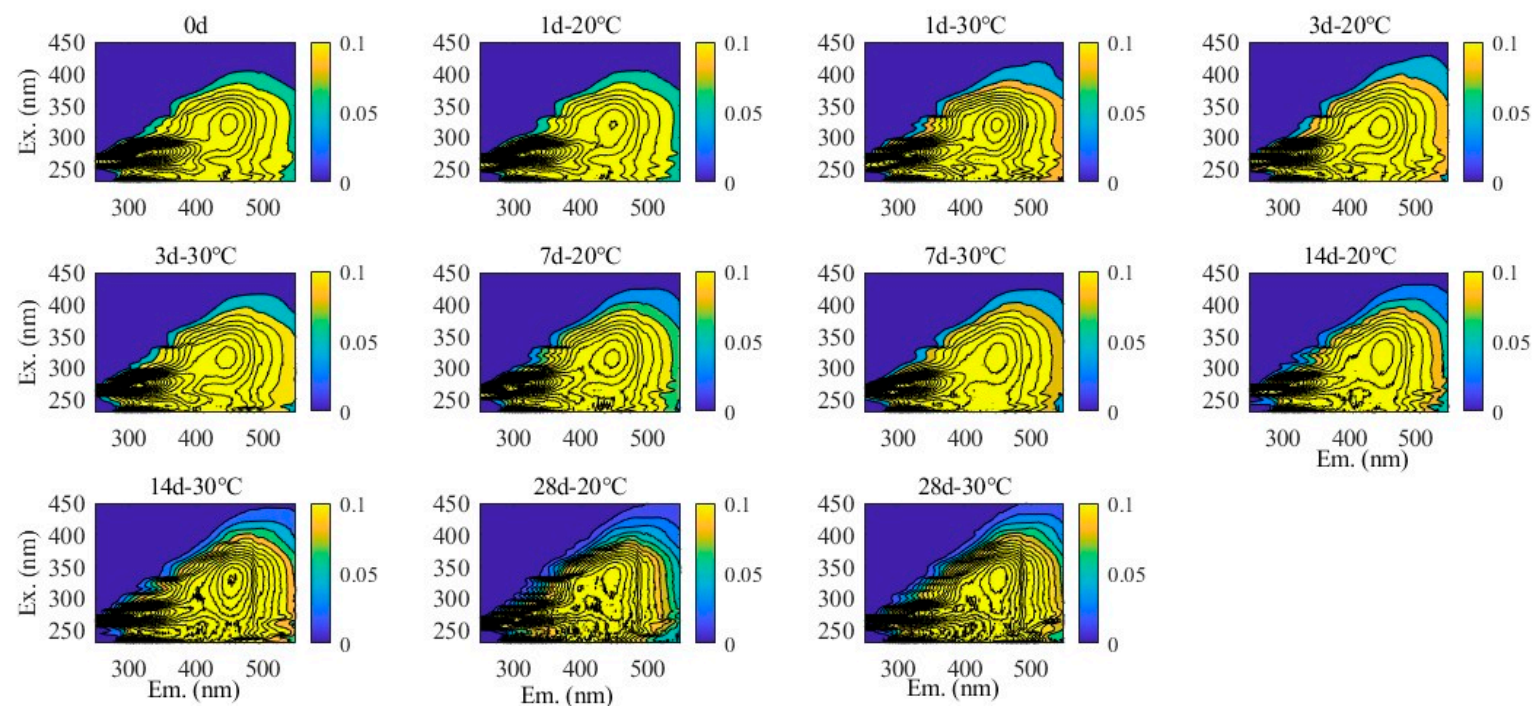

**Figure. S13** DOM degradation process of fir tree leachate.

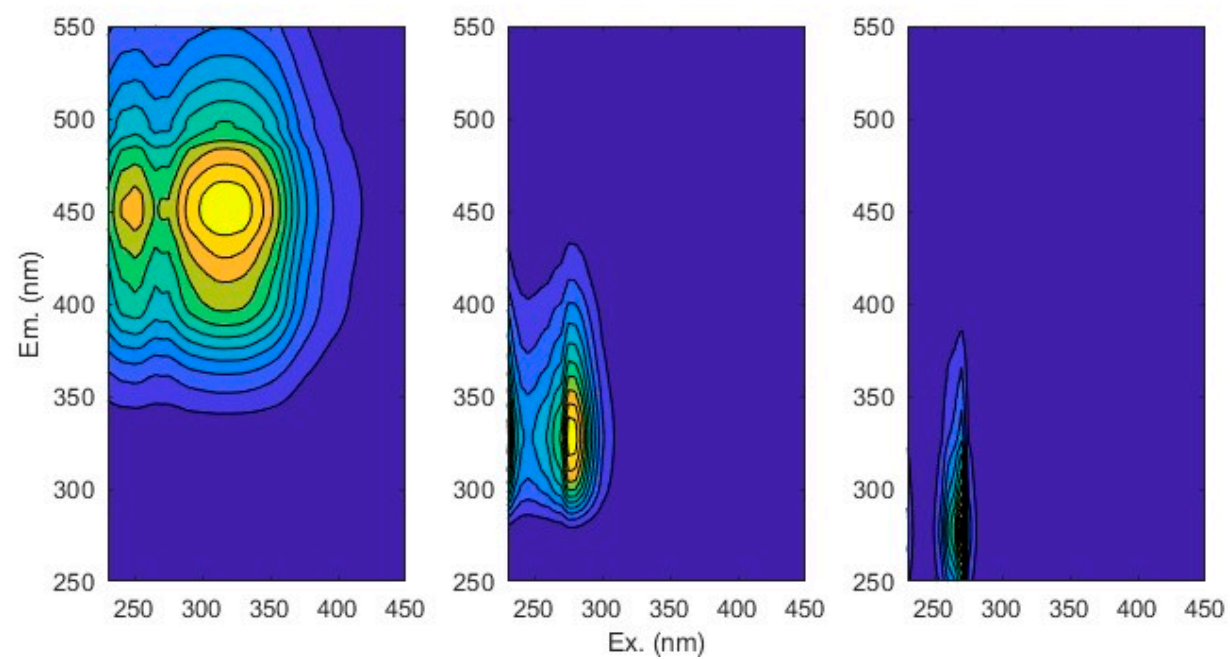

**Figure. S14** Three components of fluorescent substances in fir tree leachate.

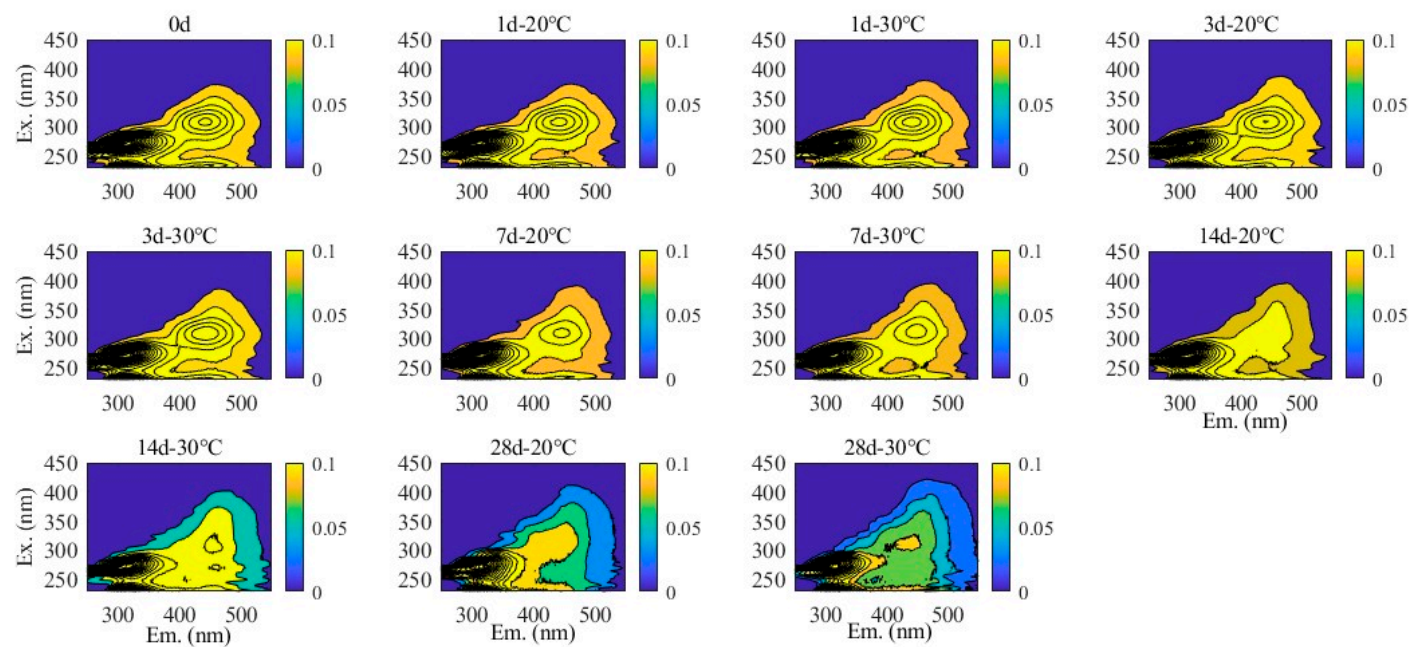

**Figure. S15** DOM degradation process of Sassafras leachate.

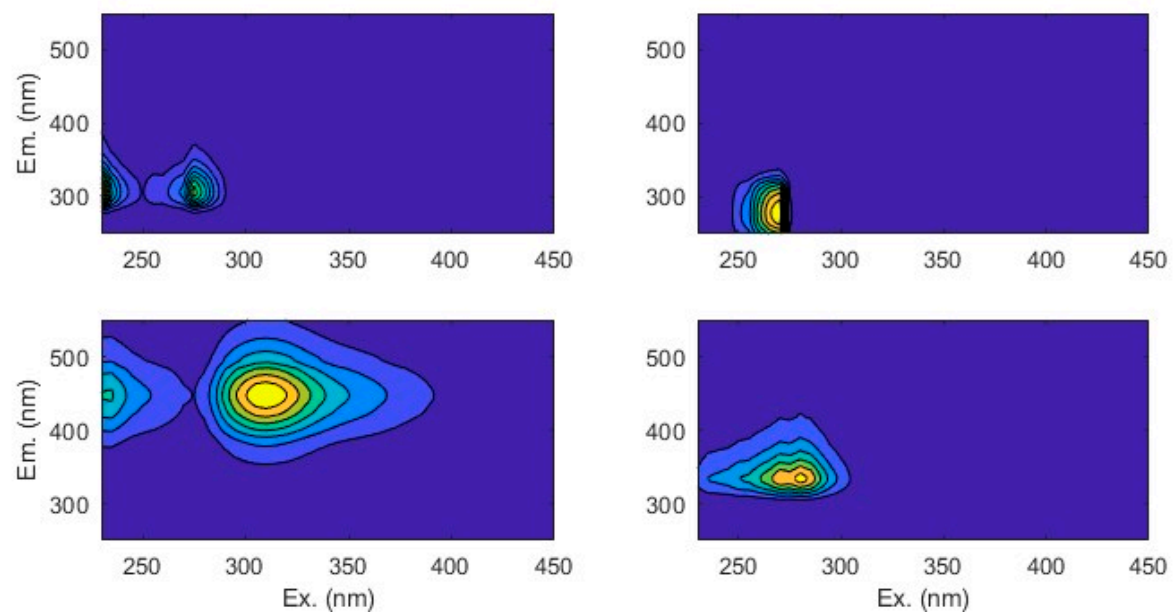

**Figure. S16** Four components of fluorescent substances in Sassafras leachate.

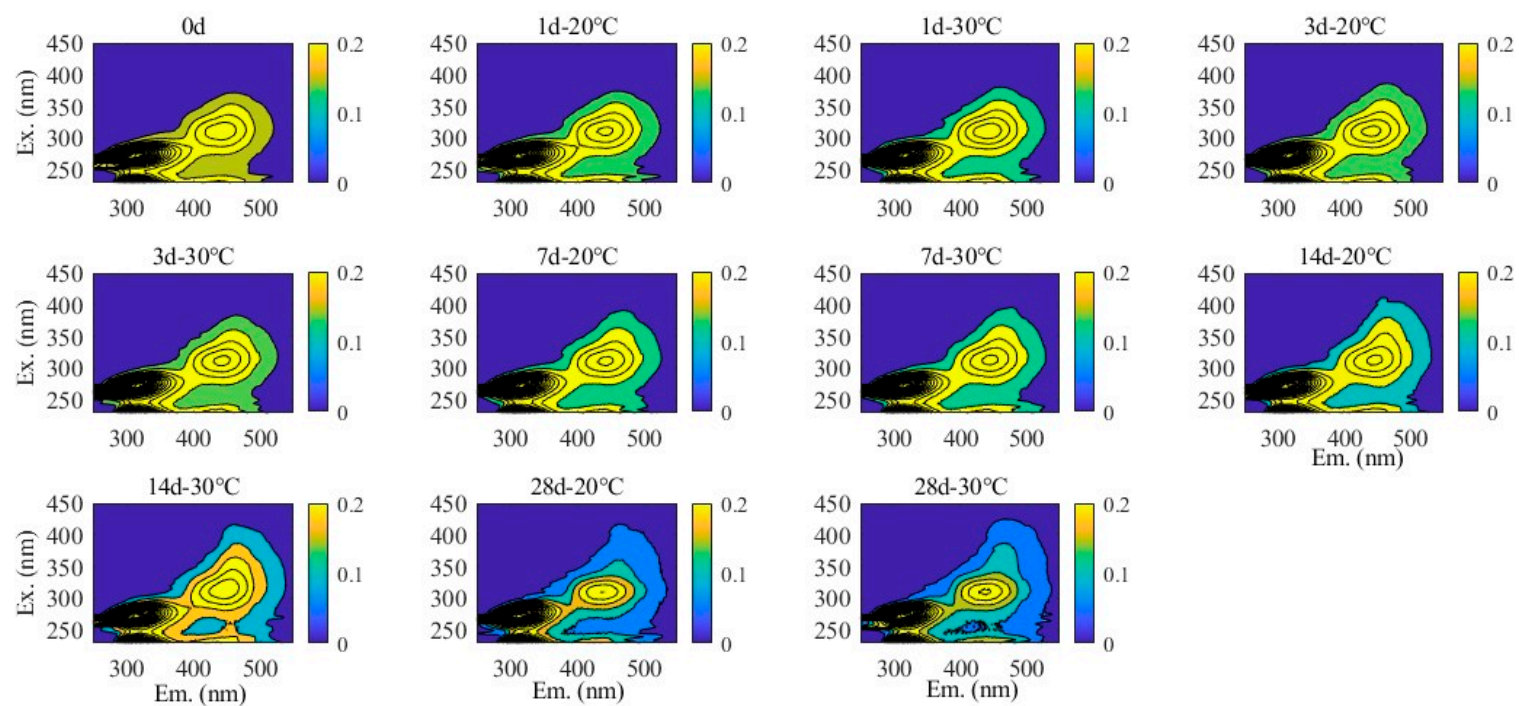

**Figure. S17** DOM degradation process of camphor tree leachate.

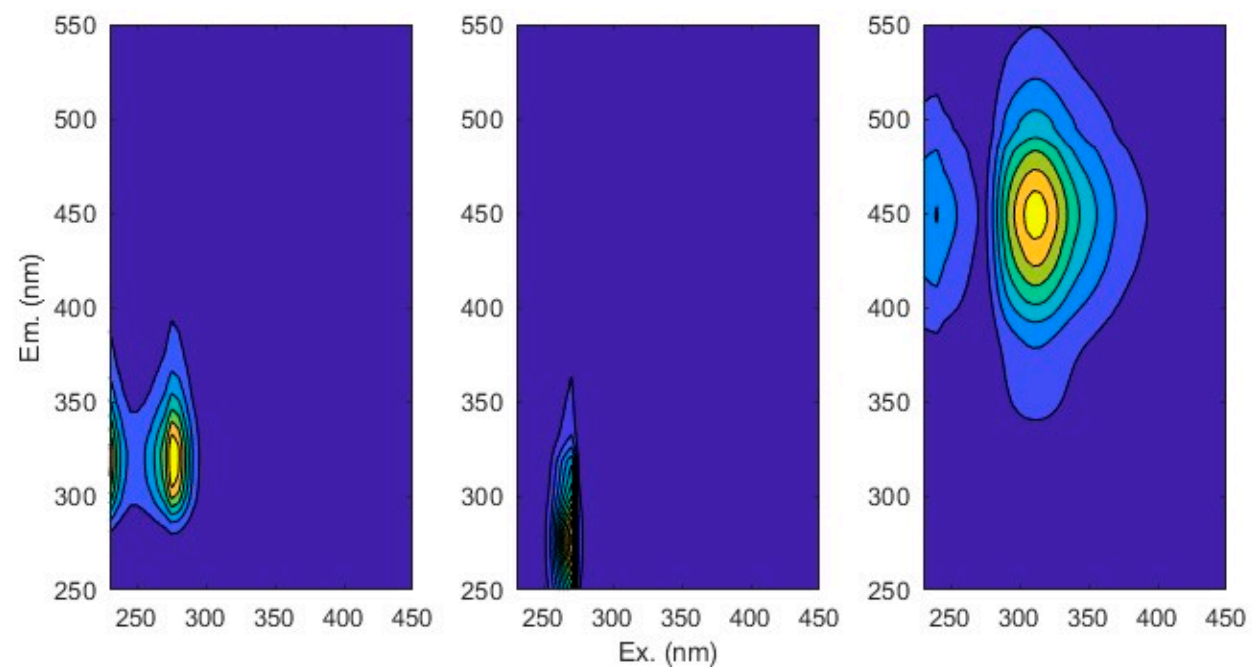

**Figure. S18** Three components of fluorescent substances in camphor tree leachate.



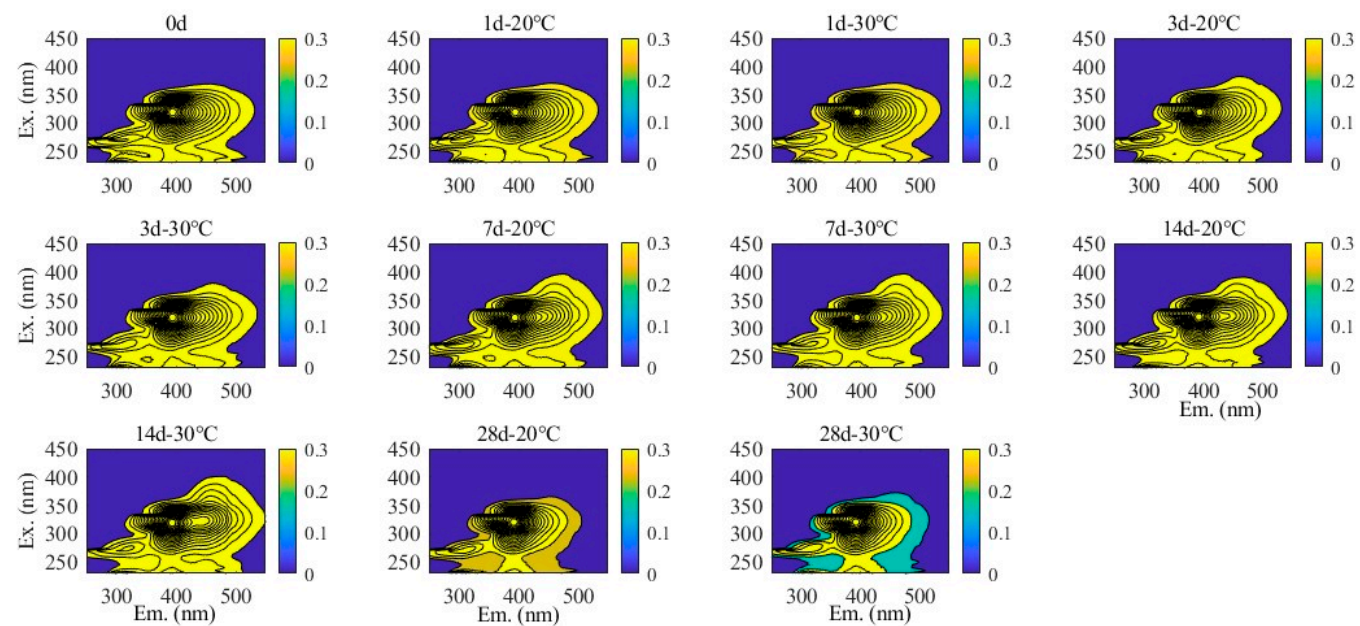

**Figure. S19** DOM degradation process of pomelo tree leachate.

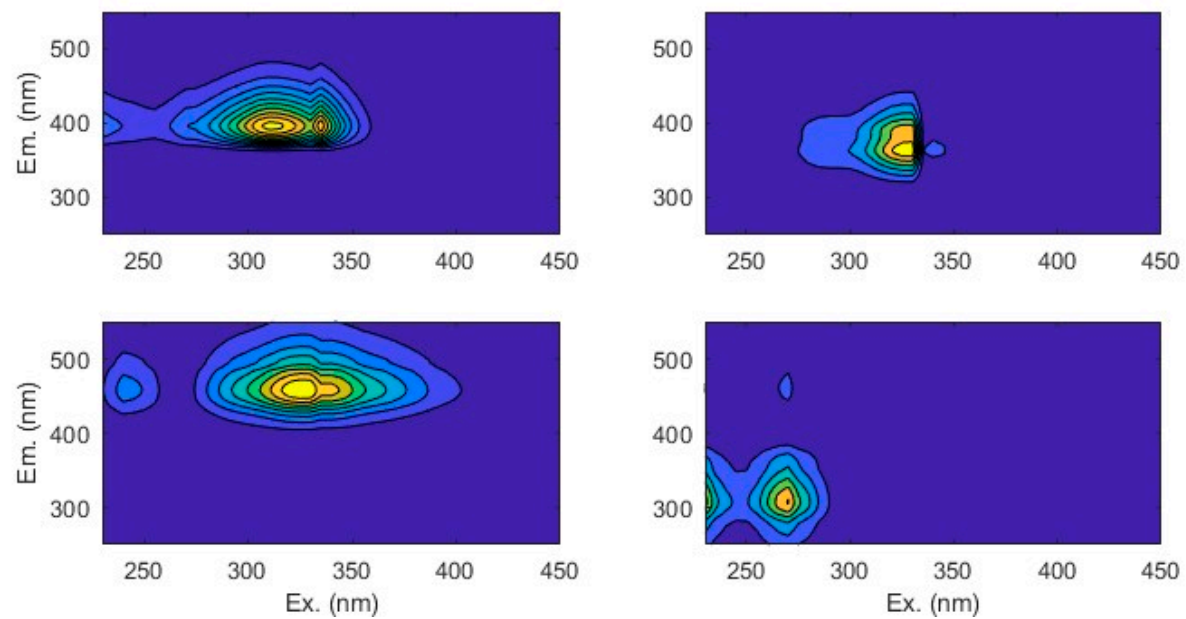

**Figure. S20** Four components of fluorescent substances in pomelo tree leachate.



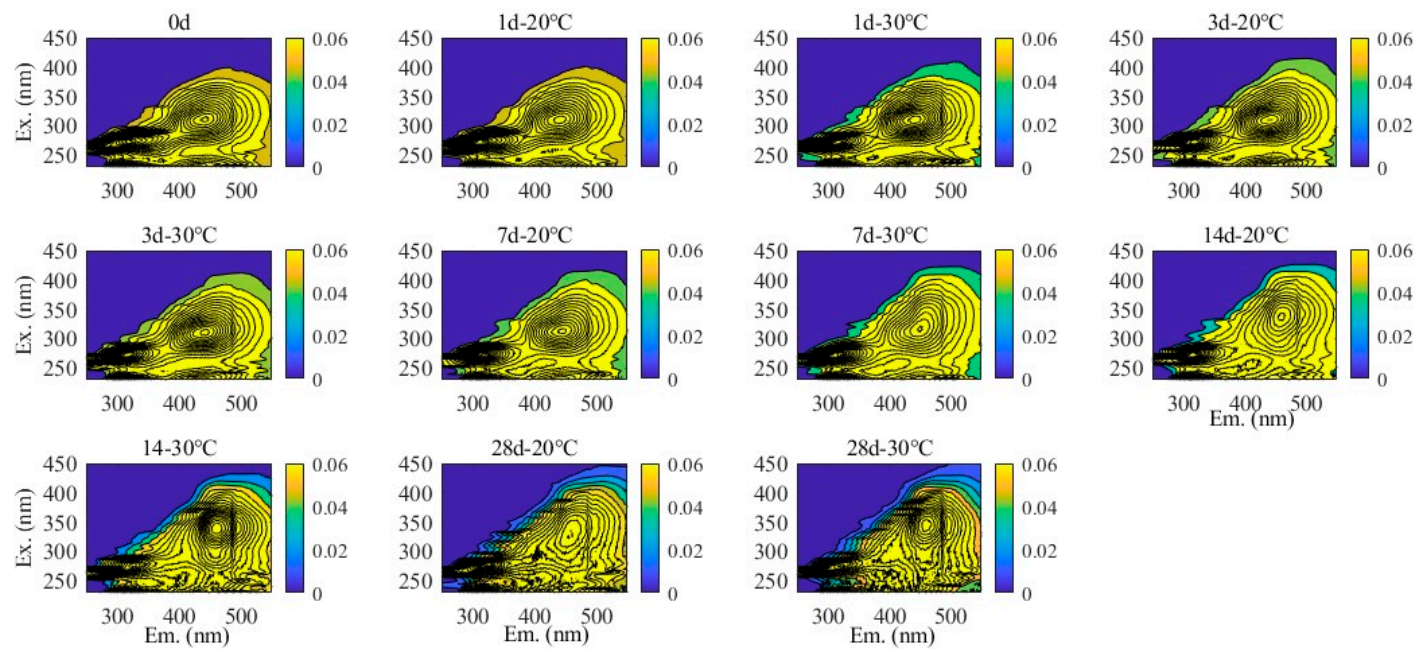

**Figure. S21** DOM degradation process of European oleander leachate.

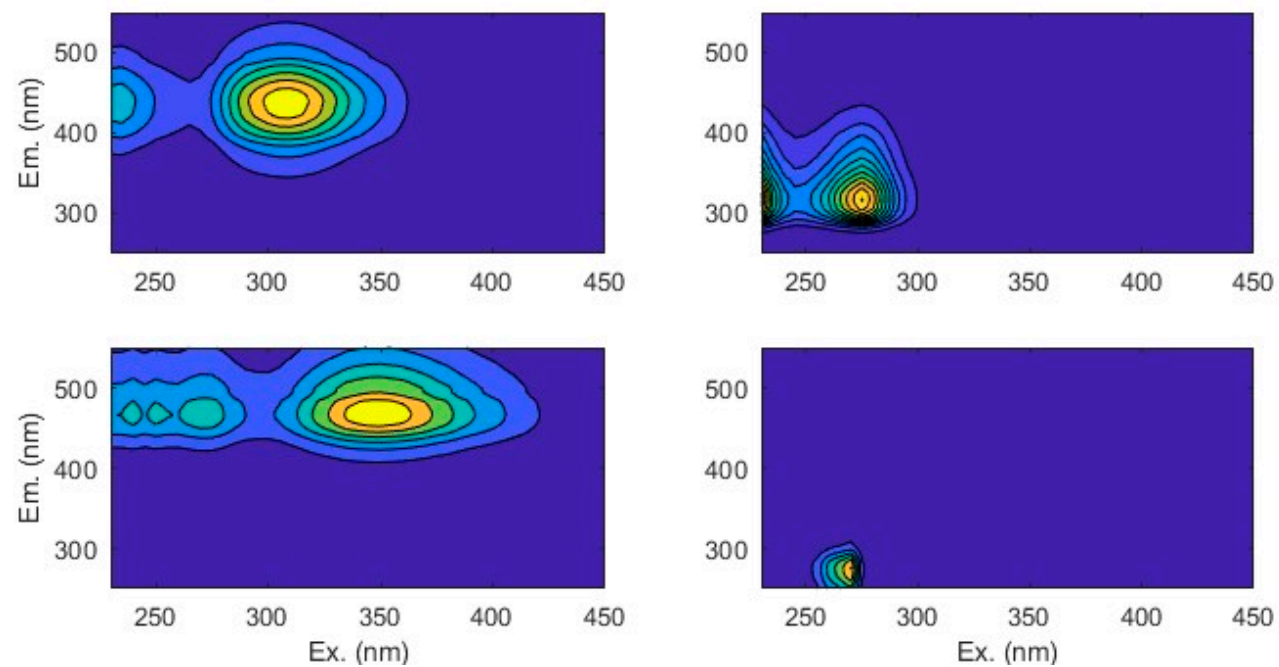

**Figure. S22** Four components of fluorescent substances in European oleander leachate.

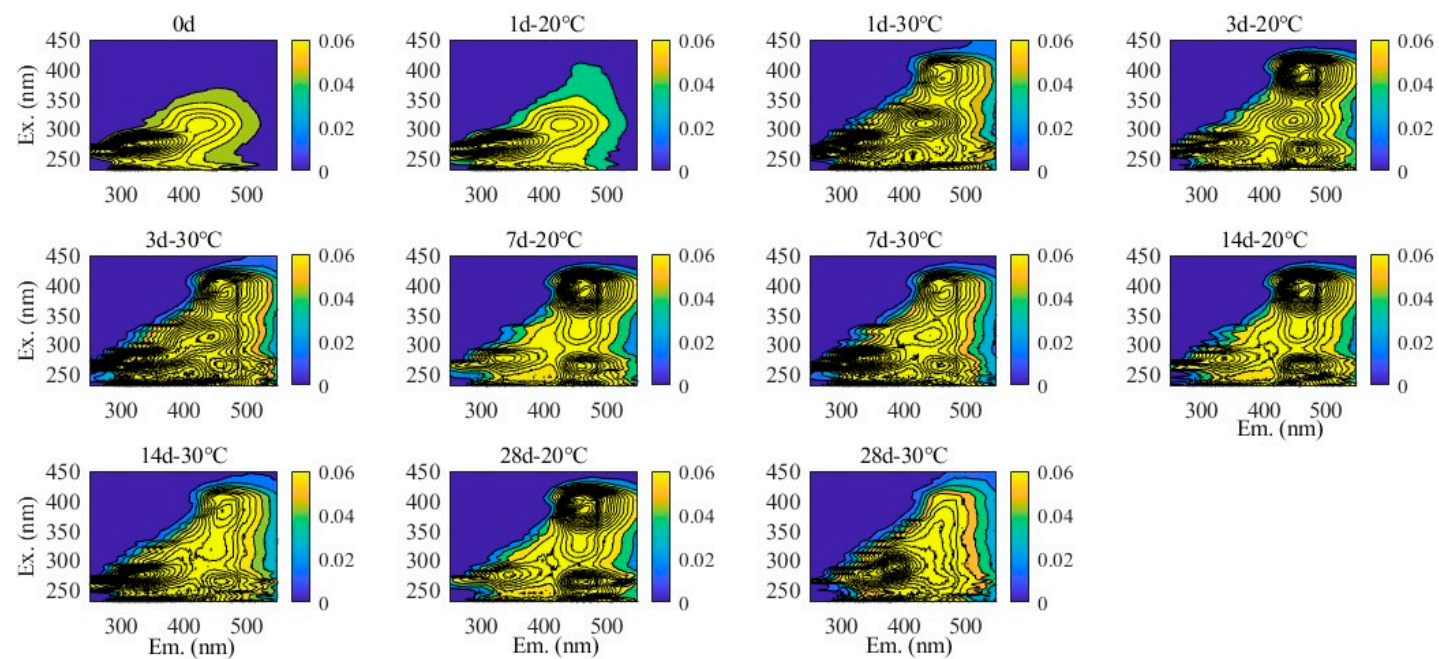

**Figure. S23** DOM degradation process of Holly guard spear leachate.

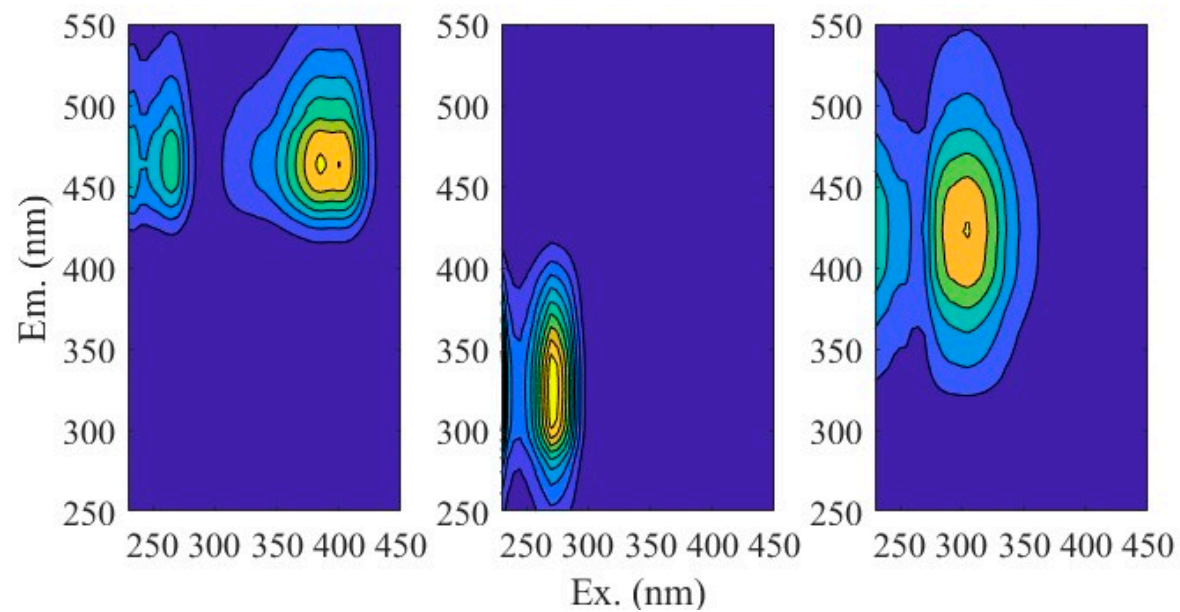

**Figure. S24** Four components of fluorescent substances in Holly guard spear leachate.

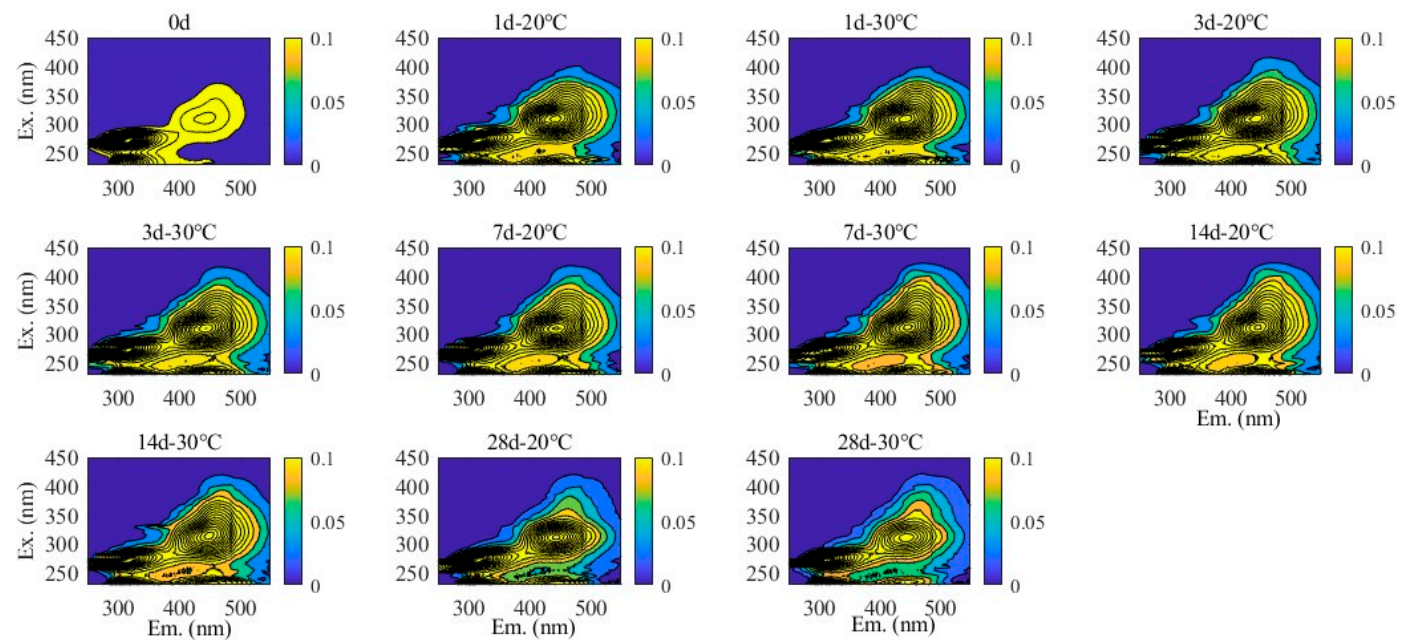

**Figure. S25** DOM degradation process of Cuckoo leachate.

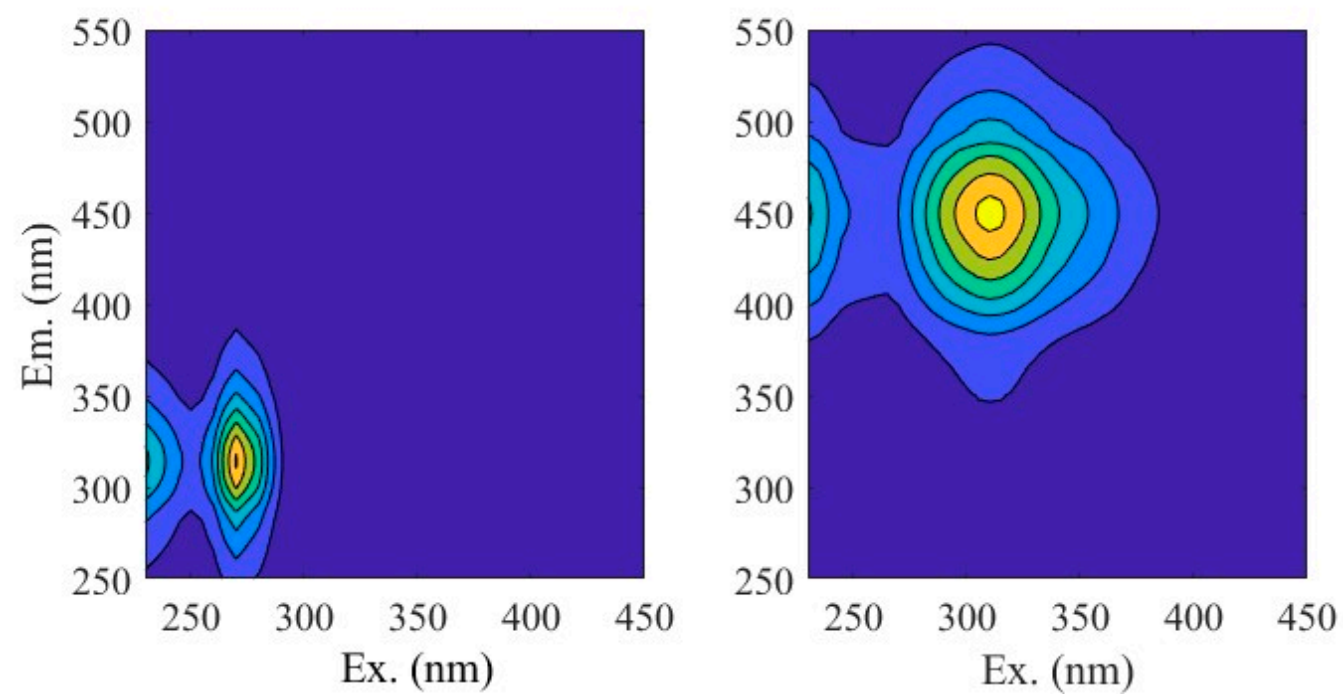

**Figure. S26** Four components of fluorescent substances in Cuckoo leachate.



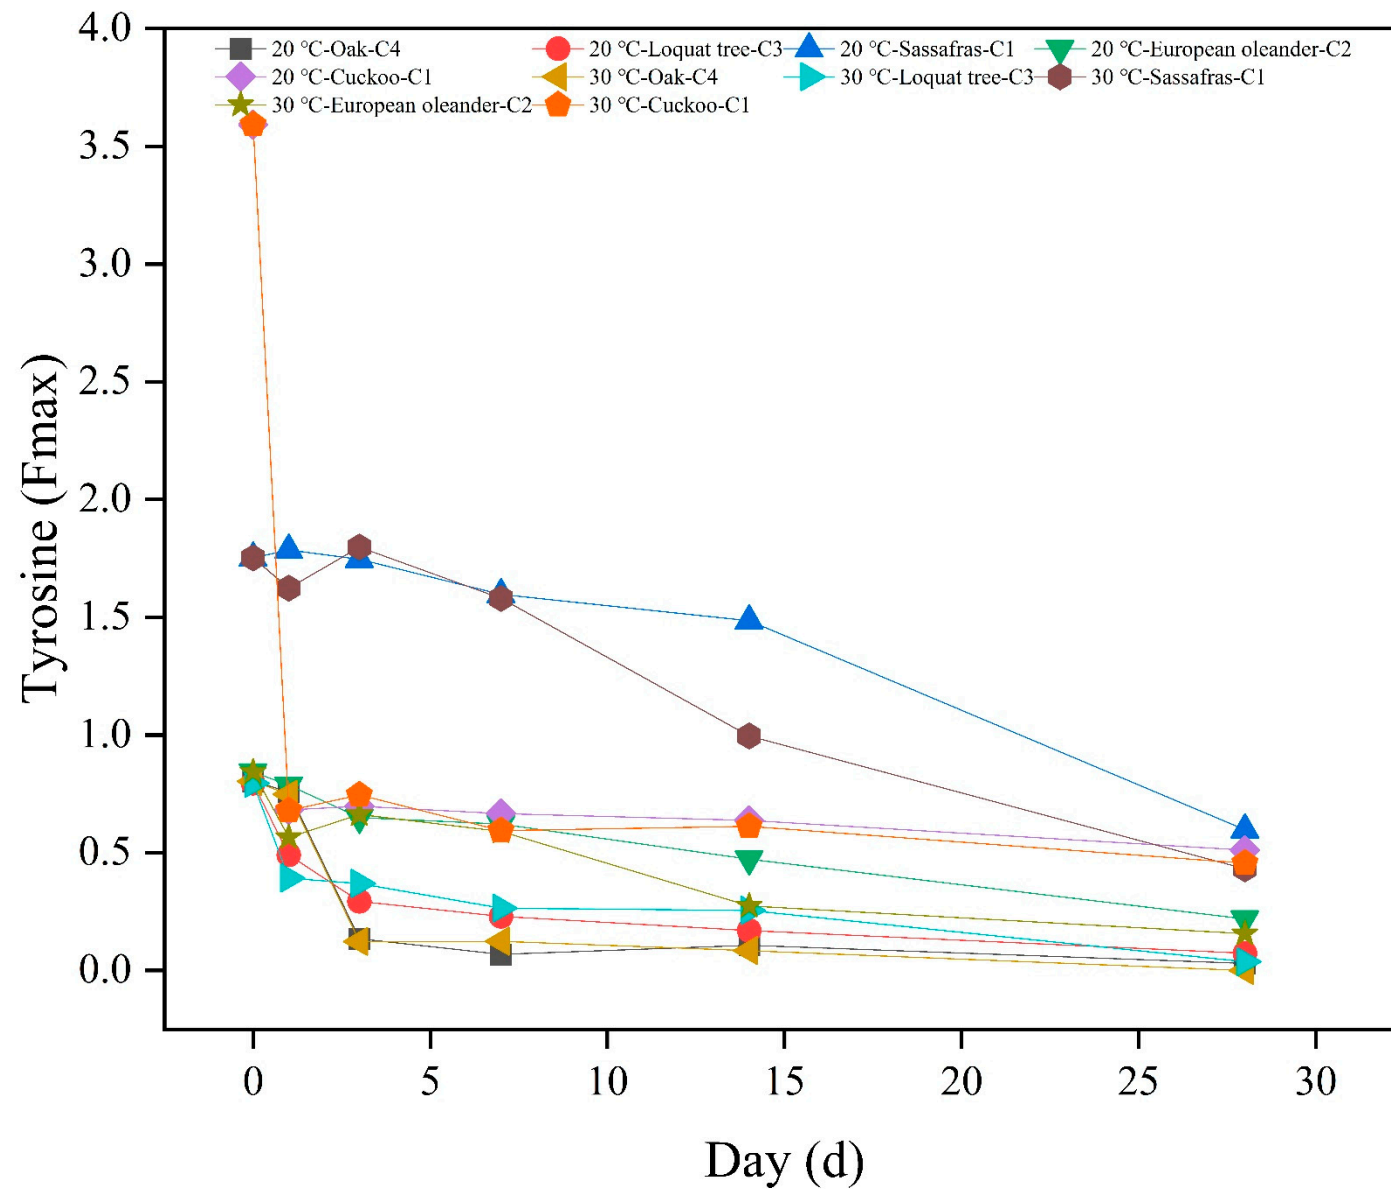

**Figure. S27** Tyrosine-like fluorescence intensity change process

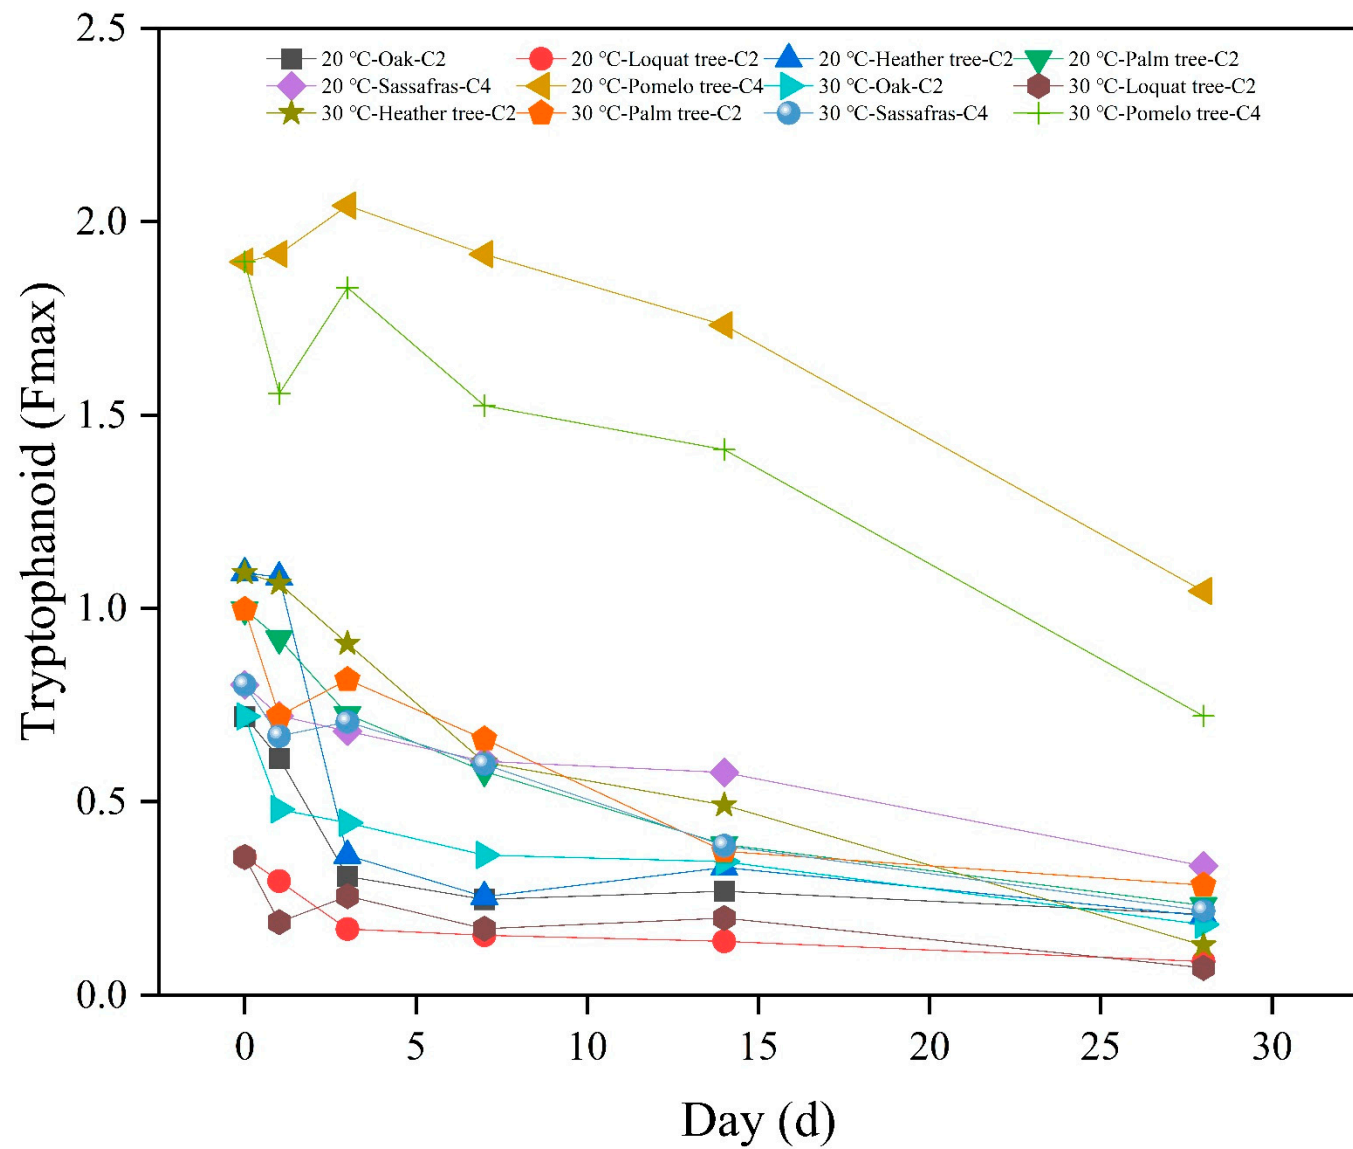

**Figure. S28** Tryptophan-like fluorescence intensity change process



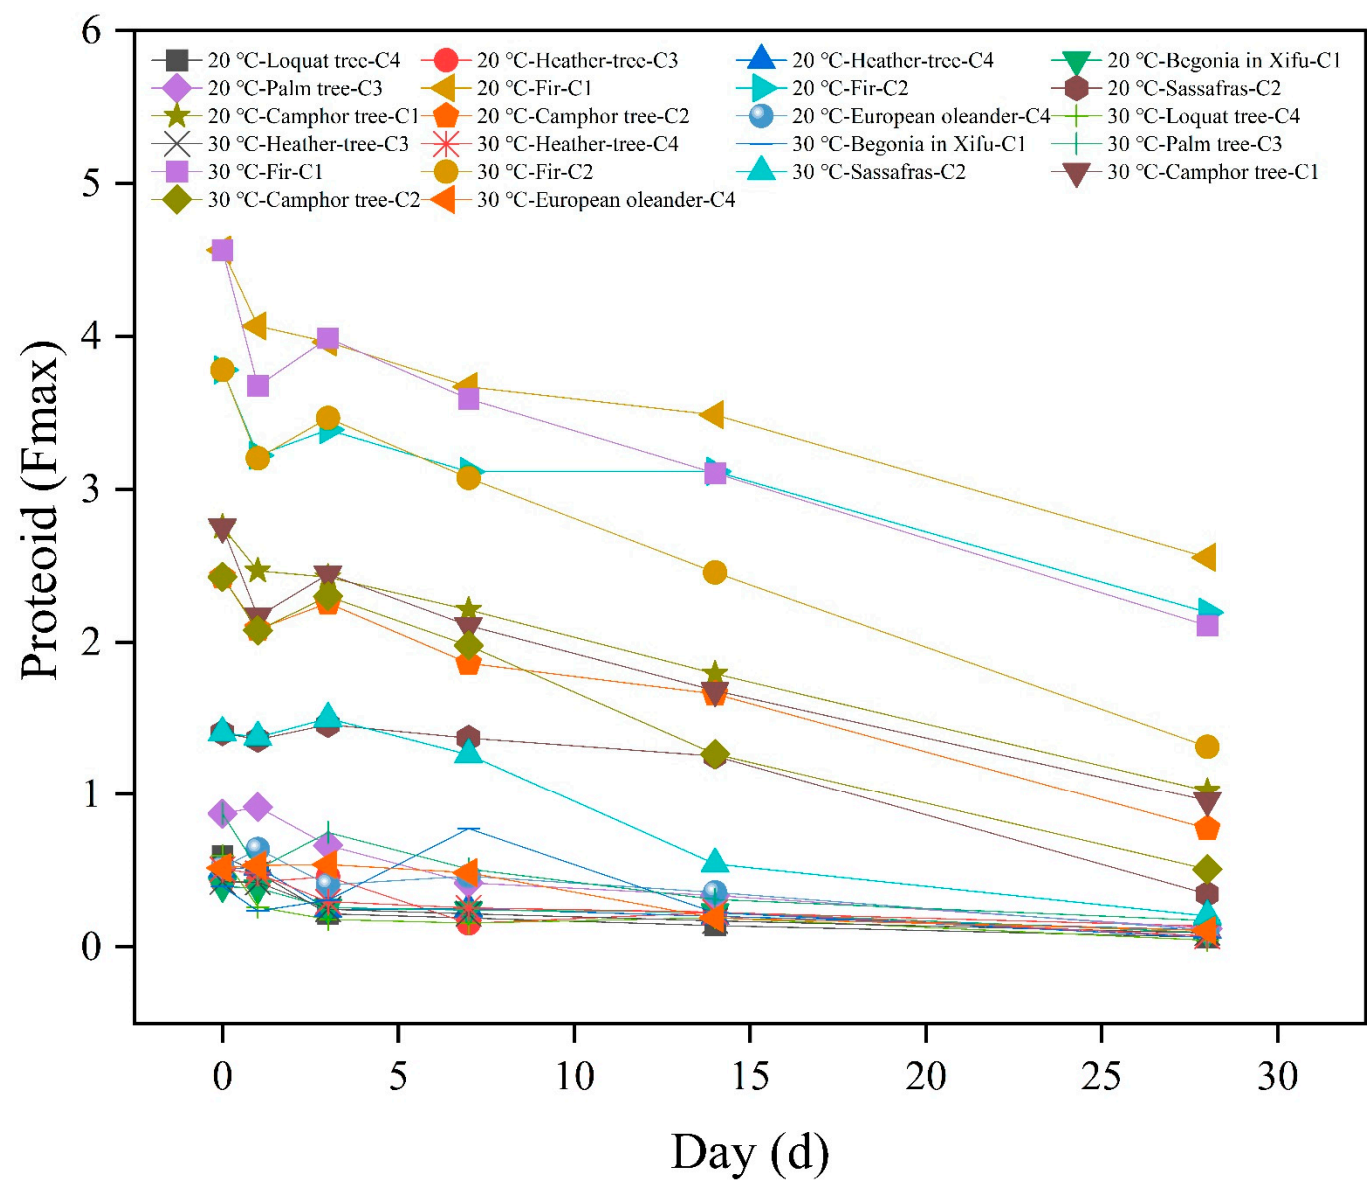

**Figure. S29** Protein-like fluorescence intensity change process

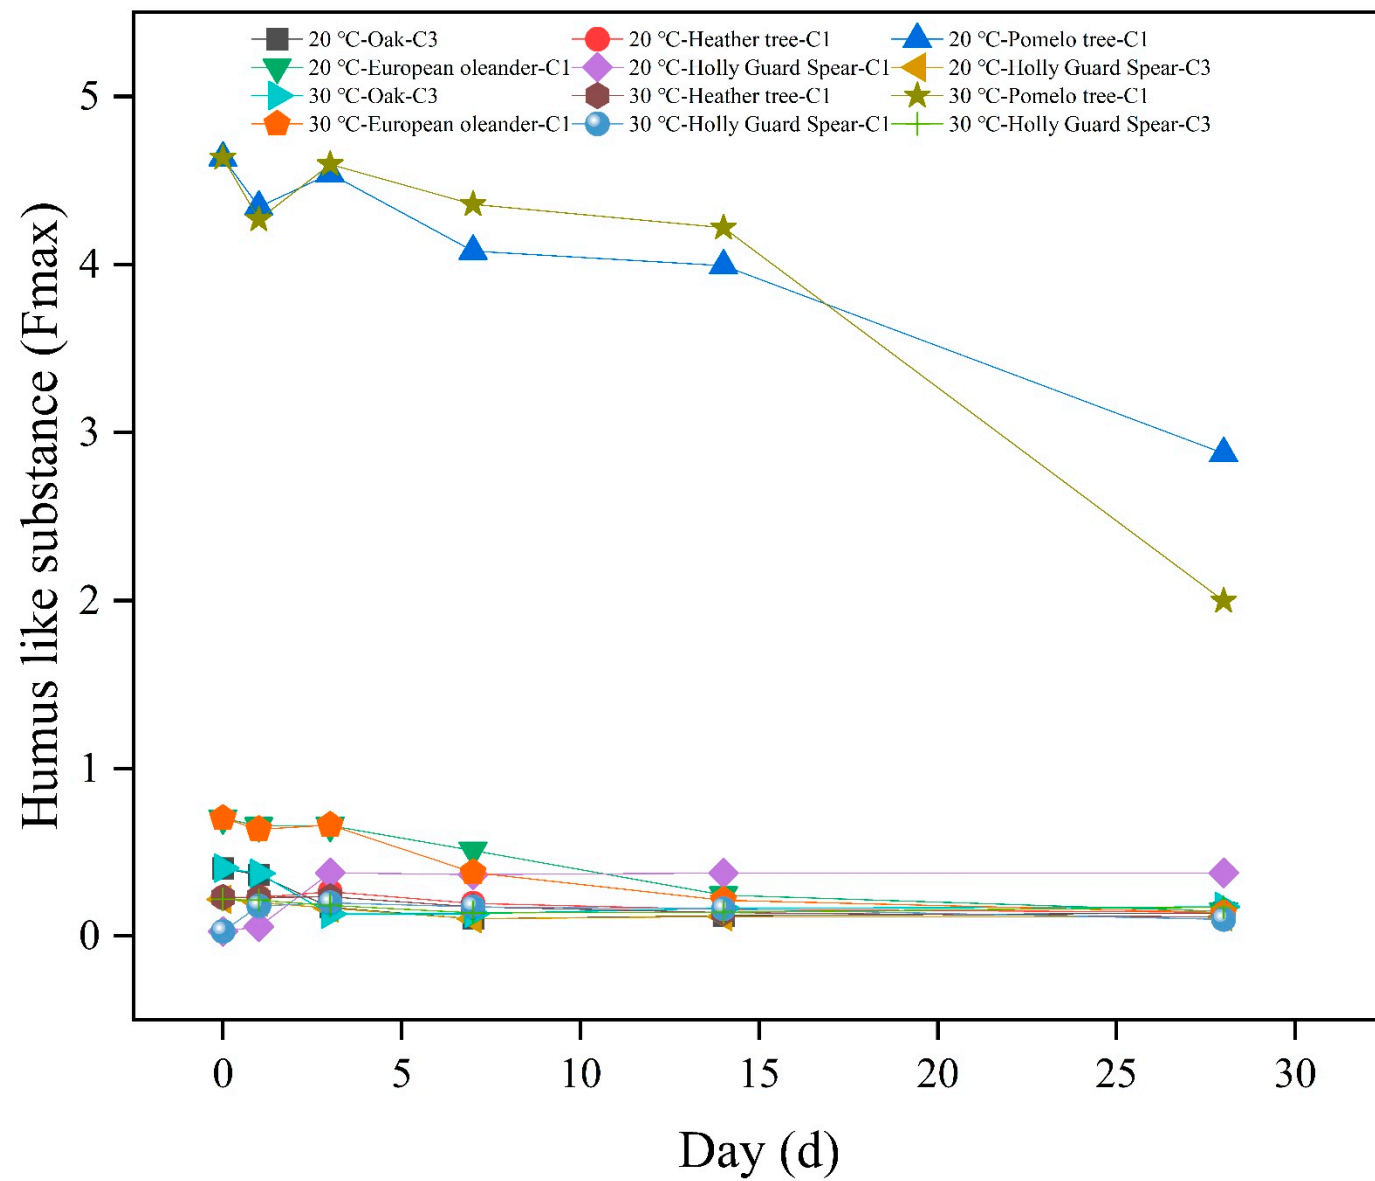

**Figure. S30** Humic-like substance fluorescence intensity change process

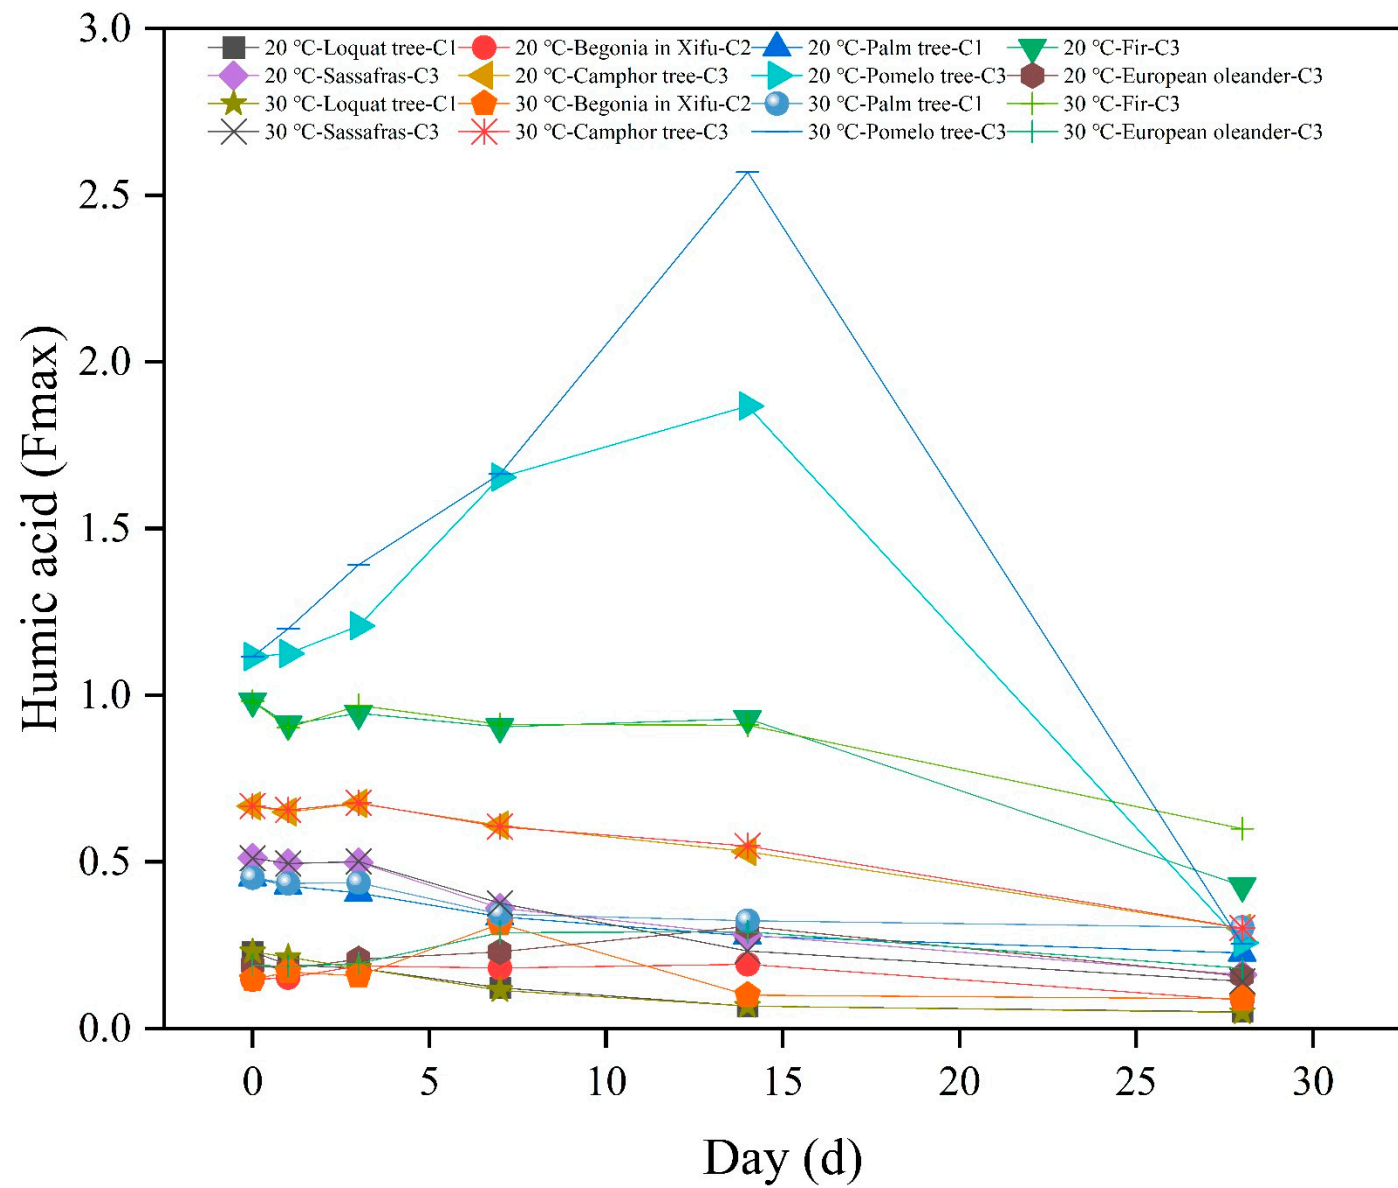

**Figure. S31** Humic-like acid fluorescence intensity change process

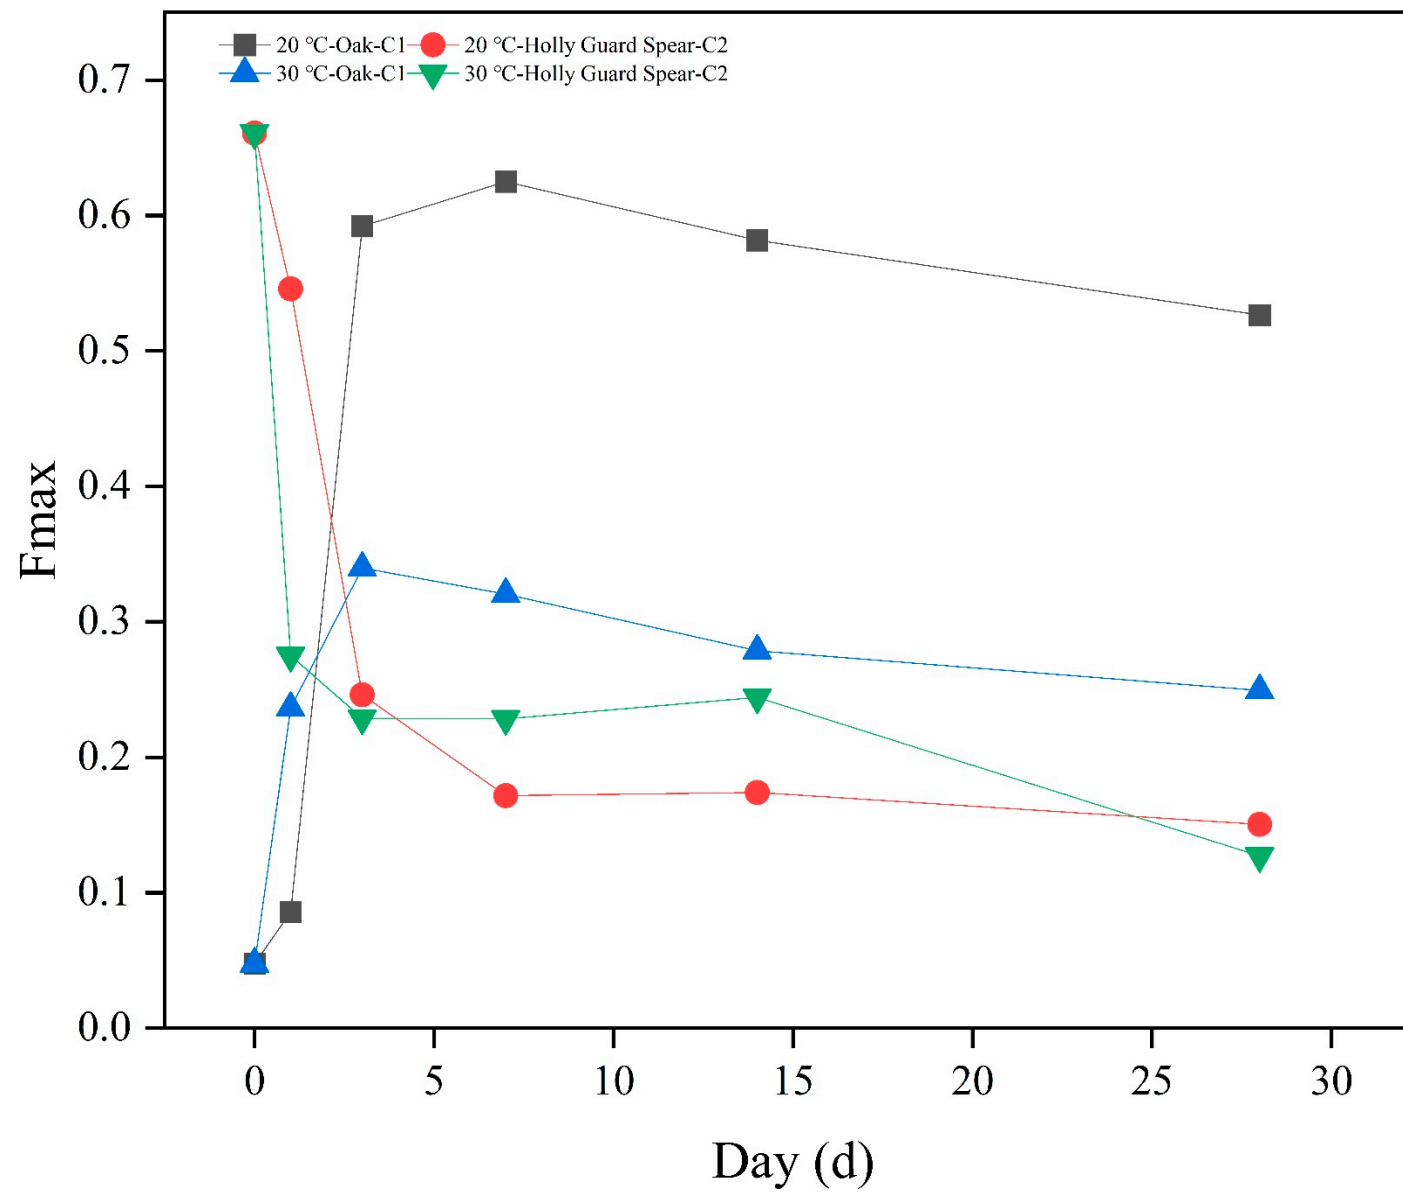

**Figure. S32** The change of fluorescence intensity of microbial source protein-like and Amino-like acid

**Table S1** Abbreviation and symbol mapping table

| Abbreviations and Symbols | Annotation                                                      |
|---------------------------|-----------------------------------------------------------------|
| DOM                       | dissolved organic matter                                        |
| CDOM                      | colored dissolved organic matter                                |
| DOC                       | dissolved organic carbon                                        |
| TDN                       | total dissolved nitrogen                                        |
| TDP                       | total dissolved phosphorus                                      |
| EC                        | electrical conductivity                                         |
| CO <sub>2</sub>           | carbon dioxide                                                  |
| FRI                       | frontal rayleigh line                                           |
| BIX                       | biological index                                                |
| HIX                       | humification index                                              |
| DOC/TDN                   | ratio of dissolved organic carbon to total dissolved nitrogen   |
| DOC/TDP                   | ratio of dissolved organic carbon to total dissolved phosphorus |
| TDN/TDP                   | ratio of total dissolved nitrogen to total dissolved phosphorus |

**Table S2** Parameter Significance

| Parameter indicators | Meaning or significance                                                                                                                                                                                                                                                                                   | Reference              |
|----------------------|-----------------------------------------------------------------------------------------------------------------------------------------------------------------------------------------------------------------------------------------------------------------------------------------------------------|------------------------|
| $\alpha_{254}$       | The concentration of CDOM                                                                                                                                                                                                                                                                                 | Cartisano et al., 2018 |
| $E_2/E_3$            | $E_2/E_3$ ( $\alpha_{250}/\alpha_{365}$ ) shows a significant negative correlation with the molecular weight of DOM                                                                                                                                                                                       | De Haan, 1993          |
| $E_4/E_6$            | $E_4/E_6$ ( $\alpha_{465}/\alpha_{665}$ ) shows a significant negative correlation with the degree of polymerization of the benzene ring carbon skeleton in DOM                                                                                                                                           | Chin et al., 1994      |
| $S_{275-295}$        | The spectral slope in the wavelength range of 275-295 is translated                                                                                                                                                                                                                                       | Praise et al., 2018    |
| $S_{350-400}$        | The spectral slope in the wavelength range of 350-400 is translated                                                                                                                                                                                                                                       | Praise et al., 2018    |
| $S_R$                | $S_R$ is the ratio of $S_{275-295}$ to $S_{350-400}$ , which can be used to indicate the source of DOM                                                                                                                                                                                                    | Praise et al., 2018    |
| FRI                  | FRL is the ratio of fluorescence intensity at $E_m=380$ nm when excited at $E_x=310$ nm to the maximum fluorescence intensity between $E_x=420-435$ nm. It indicates the proportion of newly generated DOM (Dissolved Organic Matter) in the total amount.                                                | Parlanti et al., 2000  |
| BIX                  | BIX is the ratio of fluorescence intensity at $E_m=380$ nm to that at $E_m=430$ nm when excited at $E_x=310$ nm. It is used to characterize the proportion of self-derived components in DOM. When $BIX>1$ , there is a strong self-source characteristic.                                                | Ohno, 2002             |
| HIX                  | HIX is the ratio of the integral of the region with $E_m=435-480$ nm to the sum of the integrals in the regions of $E_m=300-345$ nm and $E_m=435-480$ nm. It is used to indicate the degree of humification. $HIX>0.9$ indicates a strong Humic-like characteristic, while $HIX<0.8$ suggests a weak one. | Huguet et al., 2009)   |

**Table S3** Fluorescent substances in the fresh leaf leached DOC.

| Leaf name         | C1                                              | C2                             | C3                                  | C4                             |
|-------------------|-------------------------------------------------|--------------------------------|-------------------------------------|--------------------------------|
| Oak               | Protein-like of microbial origin<br>Ex400,Em471 | Tryptophan-like<br>Ex275,Em331 | Humus-like substance<br>Ex305,Em438 | Tyrosine-like<br>Ex270,Em293   |
| Loquat tree       | Humic-like acid<br>Ex310,Em446                  | Tryptophan-like<br>Ex280,Em336 | Tyrosine-like<br>Ex230,Em303        | Protein-like<br>Ex270,Em278    |
| Heather tree      | Humus-like substance<br>Ex310,Em429             | Tryptophan-like<br>Ex230,Em305 | Protein-like<br>Ex270,Em338         | Protein-like<br>Ex270,Em275    |
| Begonia in Xifu   | Protein-like<br>Ex270,Em331                     | Humic-like acid<br>Ex315,Em456 | -                                   | -                              |
| Palm tree         | Humic-like acid<br>Ex315,Em452                  | Tryptophan-like<br>Ex275,Em327 | Protein-like<br>Ex270,Em277         | -                              |
| Fir               | Protein-like<br>Ex275,Em322                     | Protein-like<br>Ex270,Em277    | Humic-like acid<br>Ex320,Em456      | -                              |
| Sassafras         | Tyrosine-like<br>Ex230,Em307                    | Protein-like<br>Ex270,Em279    | Humic-like acid<br>Ex310,Em447      | Tryptophan-like<br>Ex280,Em336 |
| Camphor tree      | Protein-like<br>Ex230,Em322                     | Protein-like<br>Ex270,Em276    | Humic-like acid<br>Ex310,Em449      |                                |
| Pomelo tree       | Humus-like substance<br>Ex310,Em396             | -<br>Ex330,Em362               | Humic-like acid<br>Ex325,Em458      | Tryptophan-like<br>Ex270,Em306 |
| European oleander | Humus-like substance<br>Ex310,Em440             | Tyrosine-like<br>Ex230,Em316   | Humic-like acid<br>Ex350,Em466      | Protein-like<br>Ex270,Em275    |
| Holly Guard Spear | Humus-like substance<br>Ex385,Em464             | Amino acid<br>Ex270,Em329      | Humus-like substance<br>Ex305,Em422 | -                              |
| Cuckoo            | Tyrosine-like<br>Ex270,Em313                    | Humic-like acid<br>Ex310,Em450 | -                                   | -                              |

## References

1. Cartisano, C. M., Del Vecchio, R., Bianca, M. R., Blough, N. V., 2018. Investigating the sources and structure of chromophoric dissolved organic matter (CDOM) in the North Pacific Ocean (NPO) utilizing optical spectroscopy combined with solid phase extraction and borohydride reduction. *MAR CHEM*, 204, 20-35.
2. De Haan, H., 1993. Solar UV-light penetration and photodegradation of Humic-like substances in peaty lake water. *LIMNOL OCEANOGR*, 38(5), 1072-1076.
3. Chin, Y.-P., Aiken, G., O'Loughlin, E., 1994. Molecular weight, polydispersity, and spectroscopic properties of aquatic Humic-like substances. *ENVIRON SCI TECHNOL*, 28(11), 1853-1858.
4. Huguet, A., Vacher, L., Relexans, S., Saubusse, S., Froidefond, J. M., Parlanti, E., 2009. Properties of fluorescent dissolved organic matter in the Gironde Estuary. *ORG GEOCHEM*, 40(6), 706-719.
5. Ohno, T., 2002. Fluorescence inner-filtering correction for determining the humification index of dissolved organic matter. *EST*, 36(4), 742-746.
6. Parlanti, E., Worz, K., Geoffroy, L., Lamotte, M., 2000. Dissolved organic matter fluorescence spectroscopy as a tool to estimate biological activity in a coastal zone submitted to anthropogenic inputs. *ORG GEOCHEM*, 31(12), 1765-1781.
7. Praise, S., Ito, H., An, Y., Watanabe, K., Watanabe, T., 2018. Dissolved organic matter characteristics along sabo dammed streams based on ultraviolet visible and fluorescence spectral properties. *ENVIRON MONIT ASSESS*, 190(3), 146.
